# Supplementary material for: Oxidovanadium(v) coordination compounds based on 1,5-bis(2-hydroxy-3-methoxybenzylidene)carbohydrazide: from discrete to polymeric assemblies
Source: Royal Society of Chemistry journal article supplement (doi:10.1039/d6ra02540d), 2026-05-22
Supplement: d6ra02540d1.pdf [file d6ra02540d1.pdf]

## Oxidovanadium(V) coordination compounds based on 1,5-bis(2-hydroxy-3-methoxybenzylidene)carbohydrazide: from discrete to polymeric assemblies

*Diana Dragancea, <sup>\*a</sup> Natalia Talmaci, <sup>b</sup> Sergiu Shova, <sup>c</sup> Anamaria Hanganu, <sup>a</sup> Simon Grabowsky, <sup>d</sup> Silvio Decurtins, <sup>e</sup> Shi-Xia Liu <sup>e</sup> and Svetlana G. Baca <sup>\*f</sup>*

<sup>a</sup> "C. D. Nenitzescu" Institute of Organic and Supramolecular Chemistry of the Romanian Academy, Splaiul Independentei 202B, Bucharest, Romania

<sup>b</sup> Institute of Chemistry, Moldova State University, Academy str., 3, MD2028, Chisinau, Republic of Moldova

<sup>c</sup> "Petru Poni" Institute of Macromolecular Chemistry of the Romanian Academy, Aleea Grigore Ghica Vodă 41-A, RO-700487 Iasi, Romania.

<sup>d</sup> Department of Chemistry, Biochemistry & Pharmaceutical Sciences, University of Bern, Freiestrasse 3, CH-3012 Bern, Switzerland

<sup>e</sup> Department of Chemistry, Biochemistry & Pharmaceutical Sciences, W. Inäbnit Laboratory for Molecular Quantum Materials and WSS-Research Center for Molecular Quantum Systems, University of Bern, Freiestrasse 3, CH-3012 Bern, Switzerland

<sup>f</sup> Institute of Applied Physics, Moldova State University, Academy str., 5, MD2028, Chisinau, Republic of Moldova

### Corresponding authors:

\* D.D. E-mail: [ddragancea@gmail.com](mailto:ddragancea@gmail.com)

\* S.G.B. E-mail: [svetlana.baca@ifa.usm.md](mailto:svetlana.baca@ifa.usm.md); [sbaca\\_md@yahoo.com](mailto:sbaca_md@yahoo.com)

### Content

|     |                                                                                                                             | Pages |
|-----|-----------------------------------------------------------------------------------------------------------------------------|-------|
| 1.  | <b>Scheme S1.</b> Synthesis of compounds <b>1-4</b>                                                                         | 2     |
| 2.  | <b>Fig. S1.</b> IR spectrum of H <sub>4</sub> L                                                                             | 2     |
| 3.  | <b>Fig. S2. - Fig. S5.</b> IR spectra of <b>1-4</b>                                                                         | 3-4   |
| 4.  | <b>Fig. S6. - Fig. S11.</b> ESI MS (positive/negative) spectra of <b>1-4</b>                                                | 5-10  |
| 5.  | <b>Fig. S12. - Fig. S13.</b> <sup>1</sup> H and <sup>13</sup> C NMR spectra of H <sub>4</sub> L                             | 11-11 |
| 6.  | <b>Fig. S14.</b> <sup>1</sup> H/ <sup>13</sup> C qHSQC NMR spectrum of H <sub>4</sub> L                                     | 12    |
| 7.  | <b>Fig. S15. - Fig. S23.</b> <sup>1</sup> H and <sup>13</sup> C NMR spectra of <b>1-4</b>                                   | 12-16 |
| 8.  | <b>Fig. S24. - Fig. S31.</b> Additional details in the structure of <b>1-4</b>                                              | 17-23 |
| 9.  | <b>Fig. S32. – Fig. S35.</b> PXRD patterns of <b>1-4</b>                                                                    | 24-27 |
| 10. | <b>Table S1.</b> Crystal data and details of structural determinations for <b>1-4</b>                                       | 28-29 |
| 11. | <b>Table S2.</b> Selected bond distances (Å) in <b>1-4</b>                                                                  | 30-31 |
| 12. | <b>Table S3.</b> Details of the hydrogen bonding interactions in <b>1-4</b>                                                 | 32    |
| 13. | <b>Table S4. – Table S5.</b> Continuous shape measures (CShM) of the coordination geometries of metal centers in <b>1-4</b> | 33-35 |

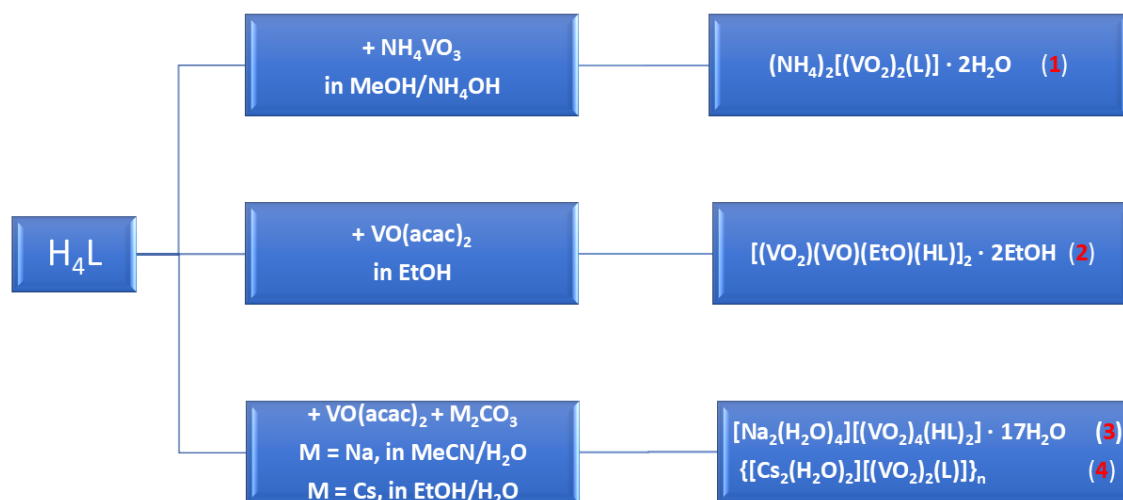

**Scheme S1.** Synthesis of compounds 1-4.

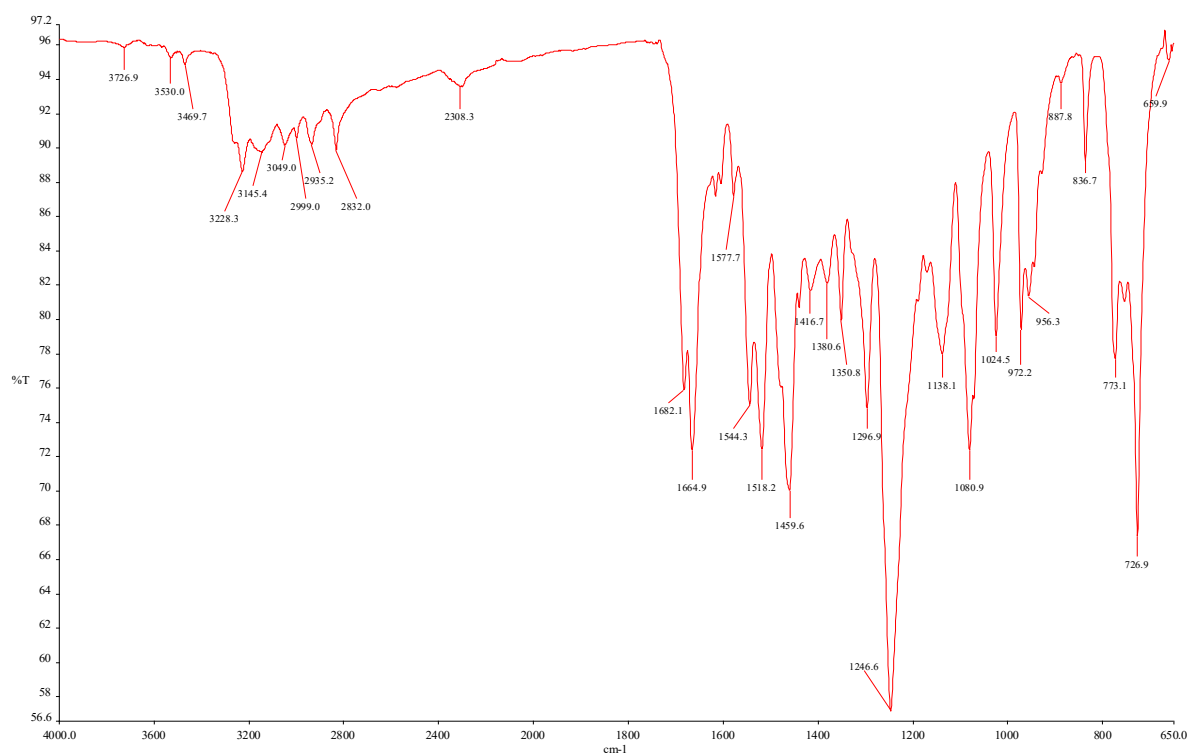

**Fig. S1.** IR spectrum of  $H_4L$  ligand.

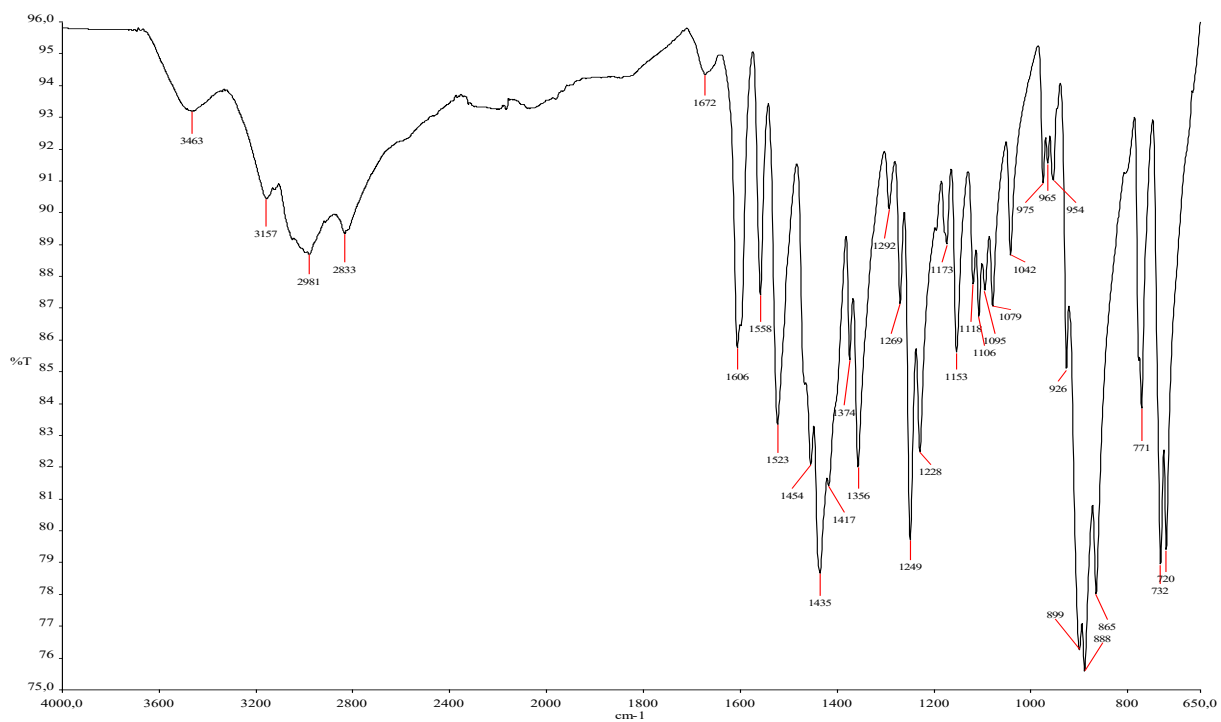

**Fig. S2.** IR spectrum of 1.

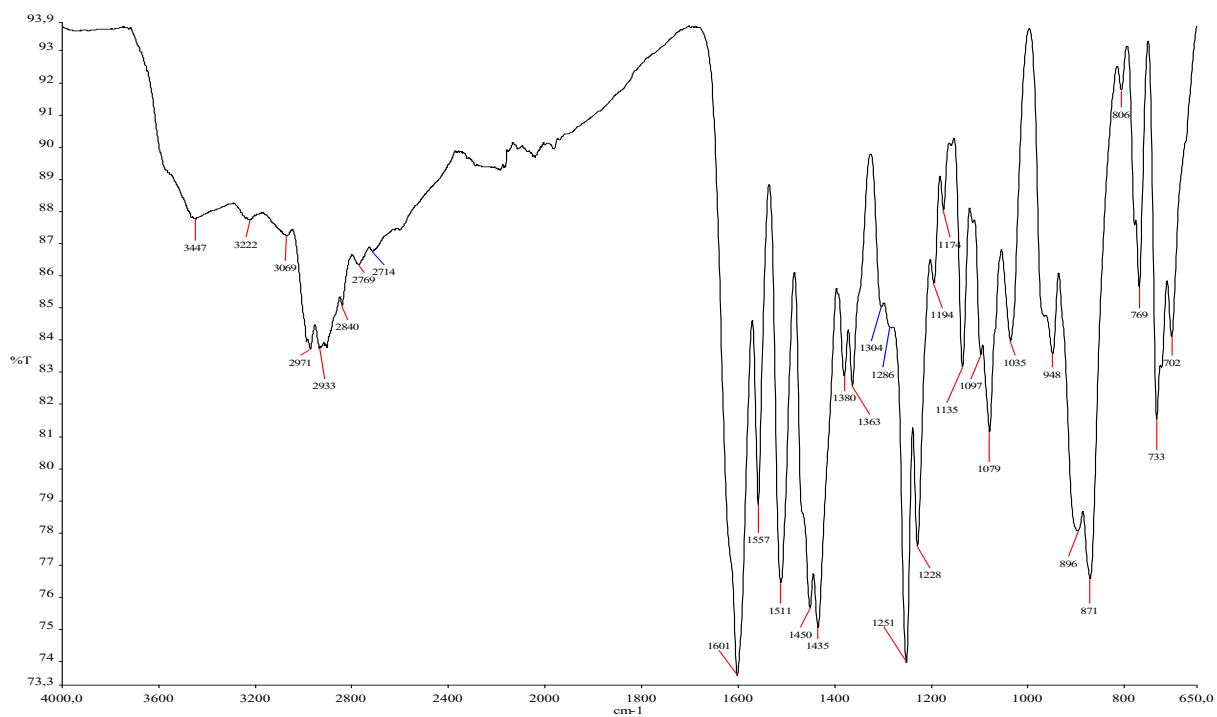

**Fig. S3.** IR spectrum of 2.

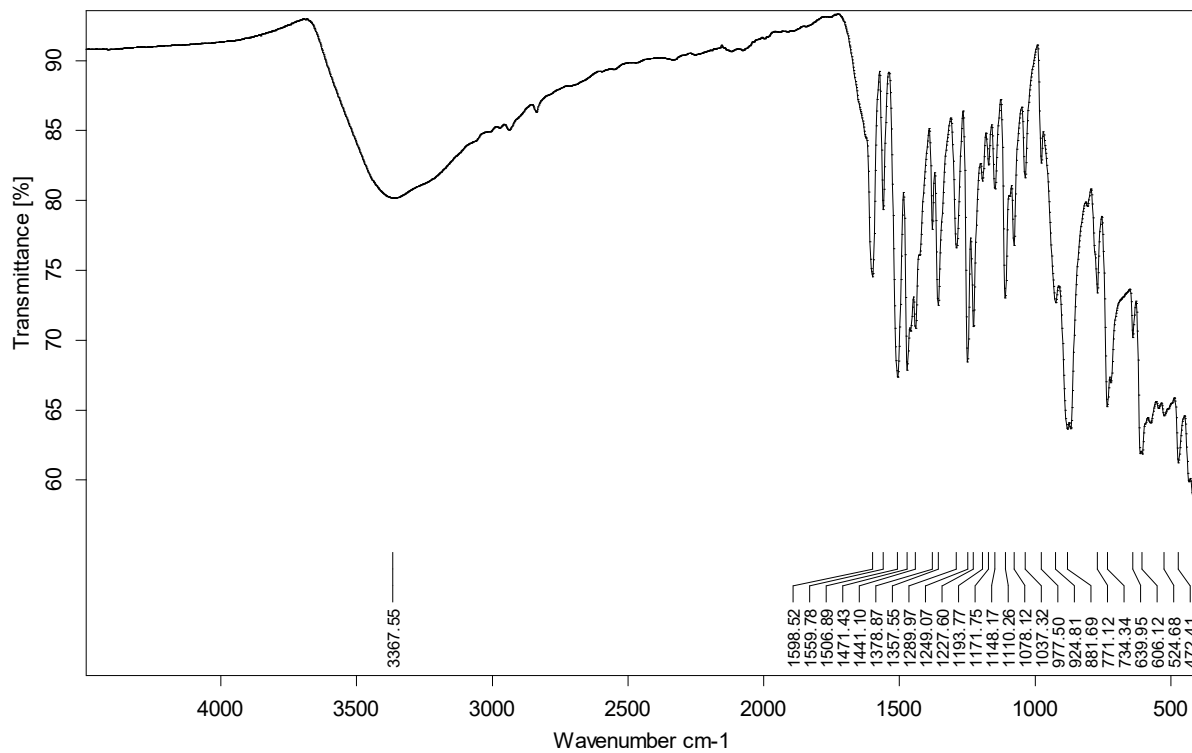

Fig. S4. IR spectrum of 3.

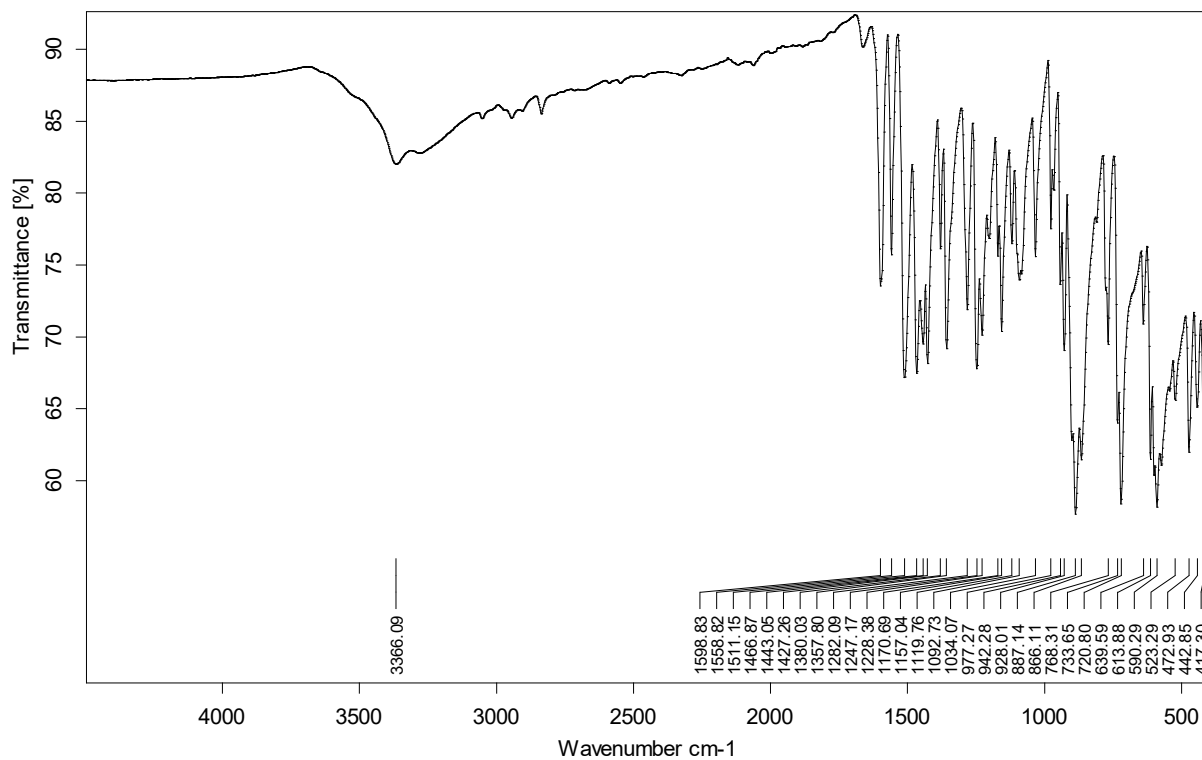

Fig. S5. IR spectrum of 4.

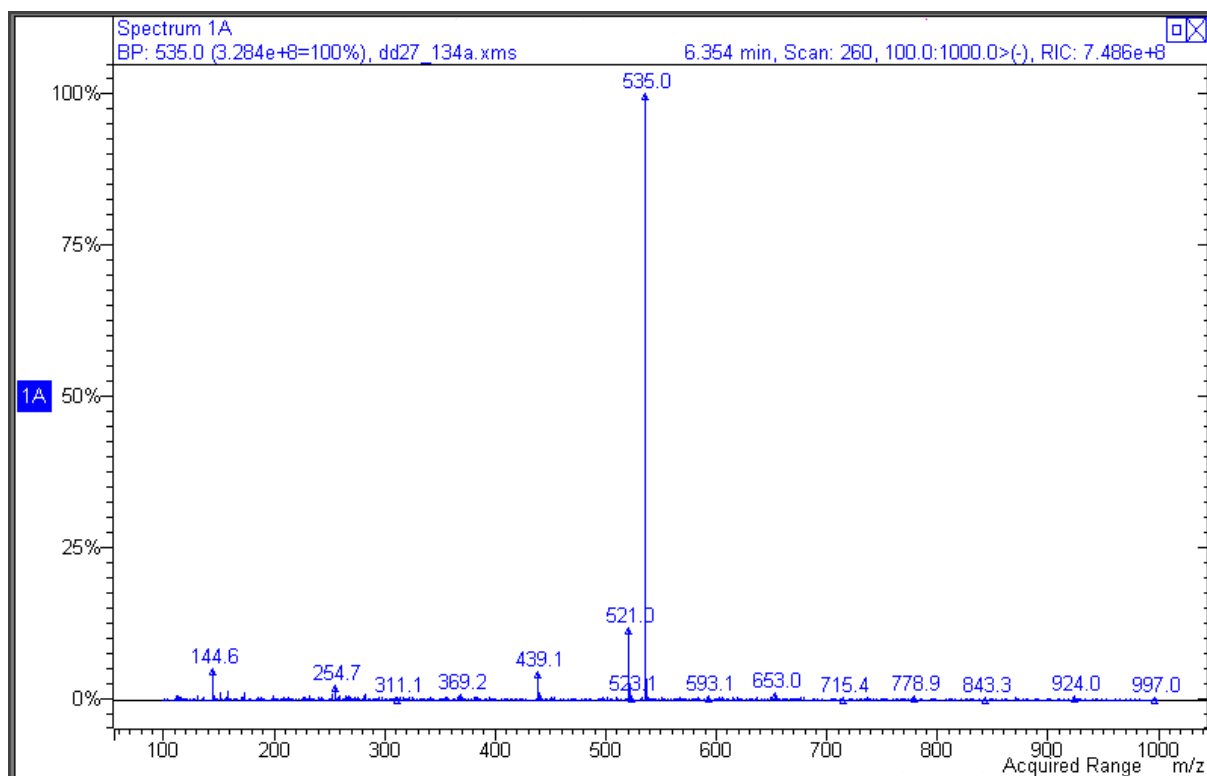

(a)

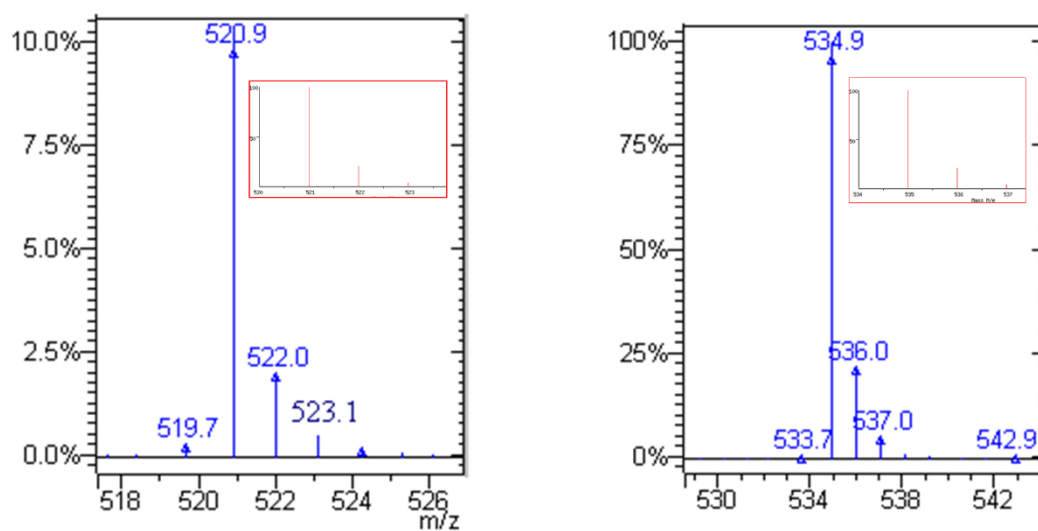

(b)

**Fig. S6.** (a) Negative-ion ESI mass spectrum of **1** in MeOH. (b) Experimental and simulated (insert) isotope patterns for the anionic fragments  $[(VO_2)_2(HL)]^-$  ( $m/z$  521) and  $[(VO_2)(VO)(L)(CH_3O)]^-$  ( $m/z$  535) in **1**.

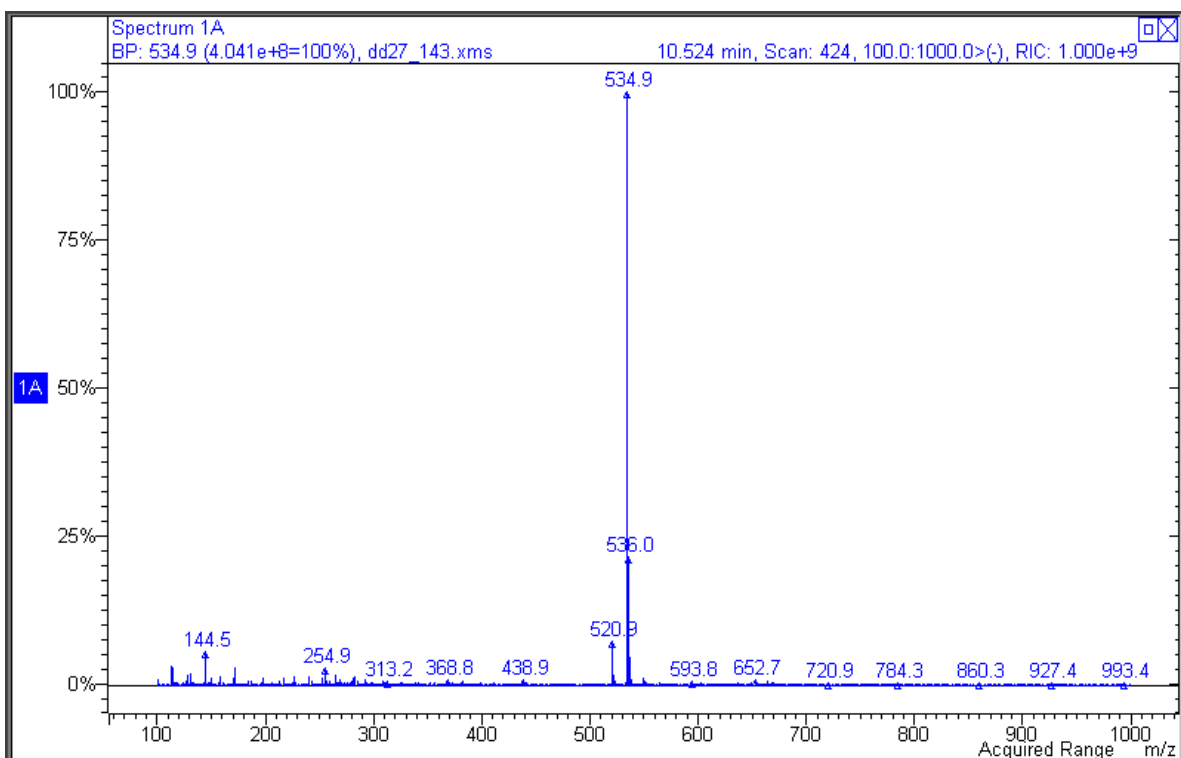

(a)

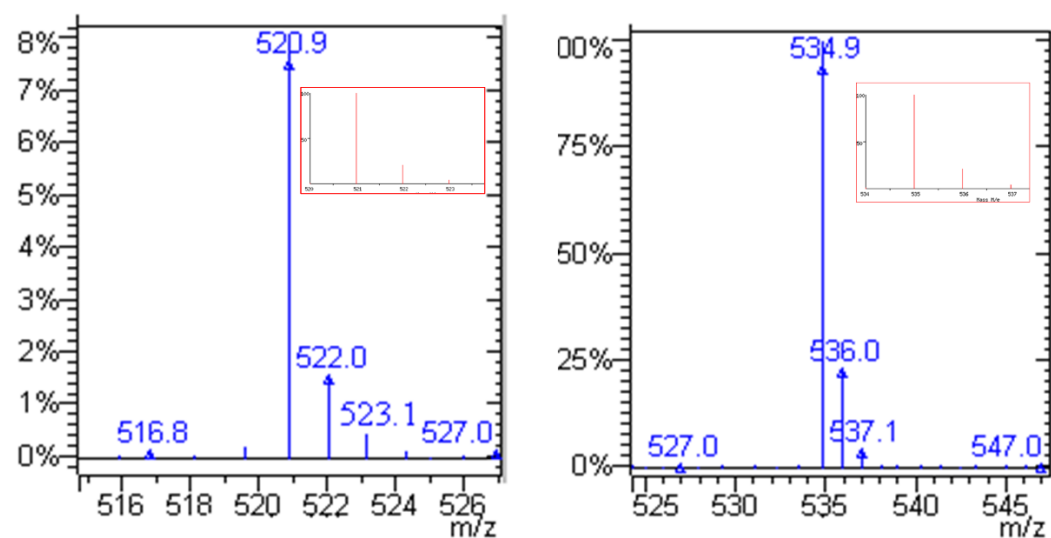

(b)

**Fig. S7.** (a) Negative-ion ESI mass spectrum of **2** in MeOH. (b) Experimental and simulated (insert) isotope patterns for the anionic fragments  $[(VO_2)_2(HL)]^-$  ( $m/z$  521) and  $[(VO_2)(VO)(L)(CH_3O)]^-$  ( $m/z$  535) in **2**.

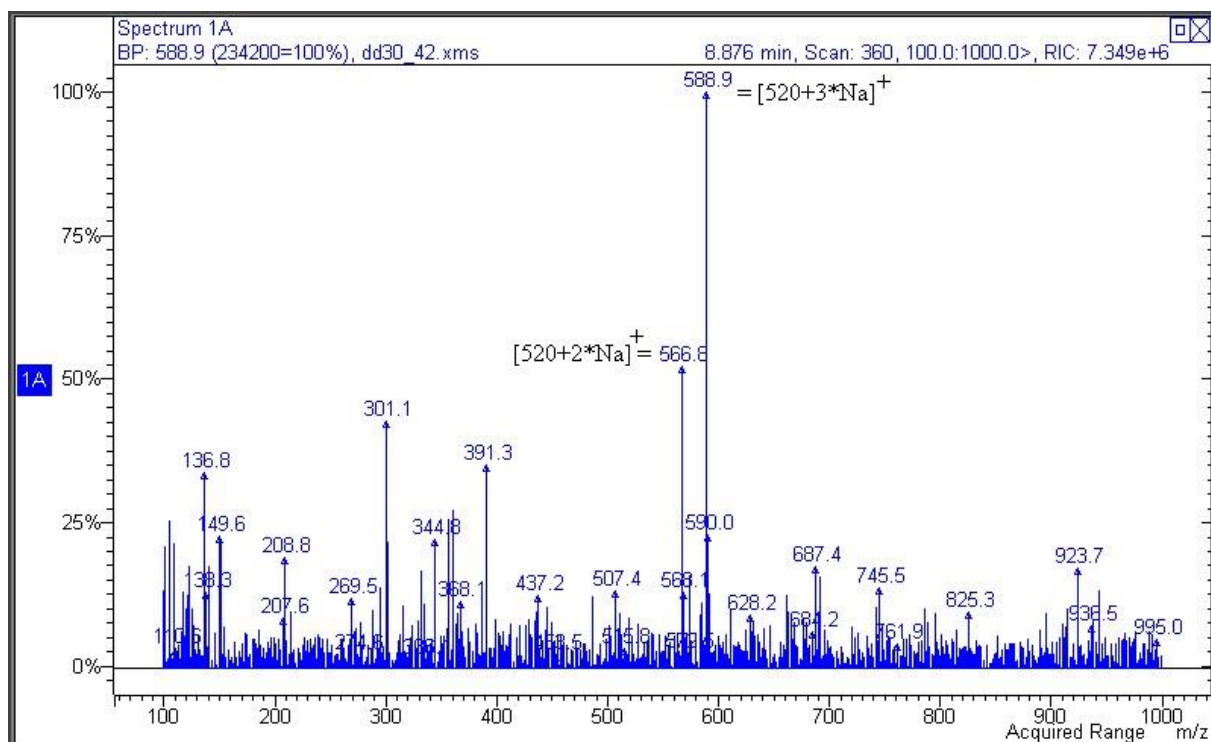

(a)

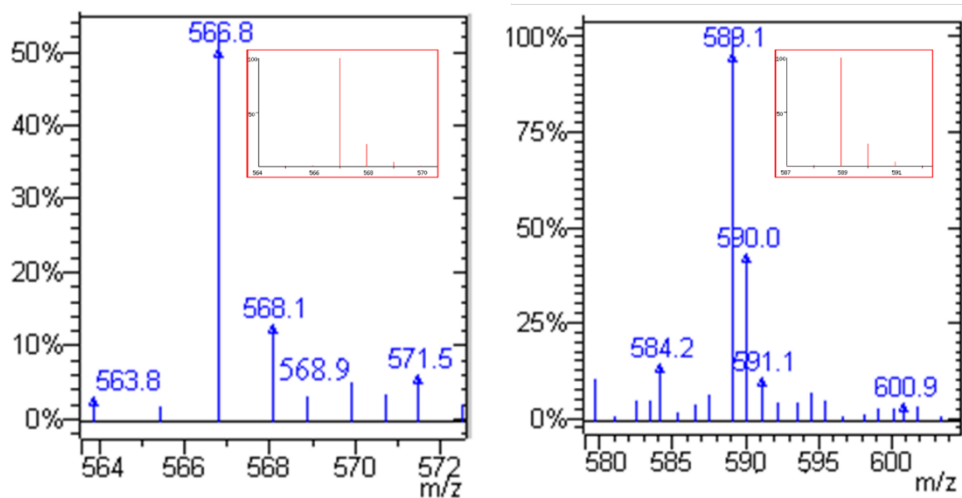

(b)

**Fig. S8.** (a) Positive-ion ESI mass spectrum of **3** in dmso. (b) Experimental and simulated (insert) isotope patterns for the cationic fragments  $\{[(VO_2)_2(L)]+2Na\}^+$  ( $m/z$  567) and  $\{[(VO_2)_2(L)]+3Na\}^+$  ( $m/z$  589) in **3**.

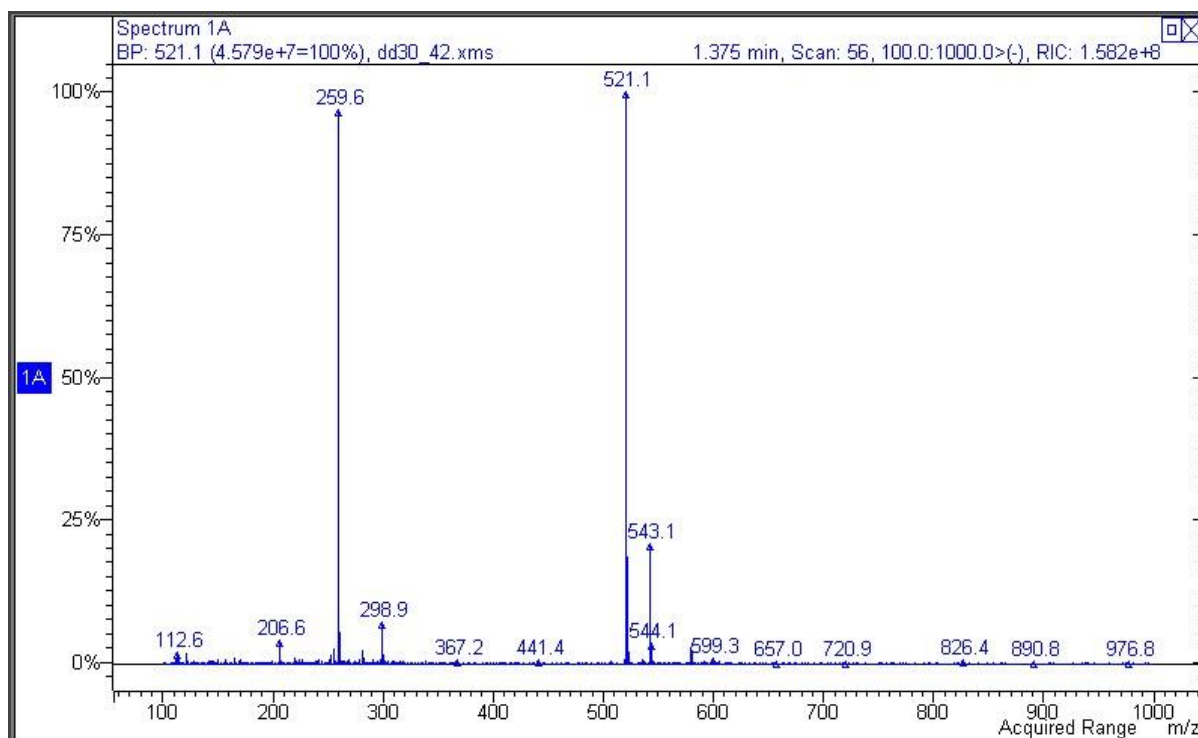

(a)

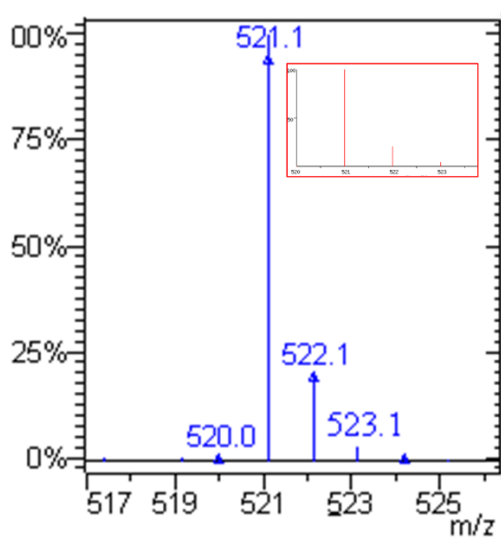

(b)

**Fig. S9.** (a) Negative-ion ESI mass spectrum of **3** in dmso. (b) Experimental and simulated (insert) isotope patterns for the anionic fragment  $[(VO_2)_2(HL)]^-$  ( $m/z$  521) in **3**.

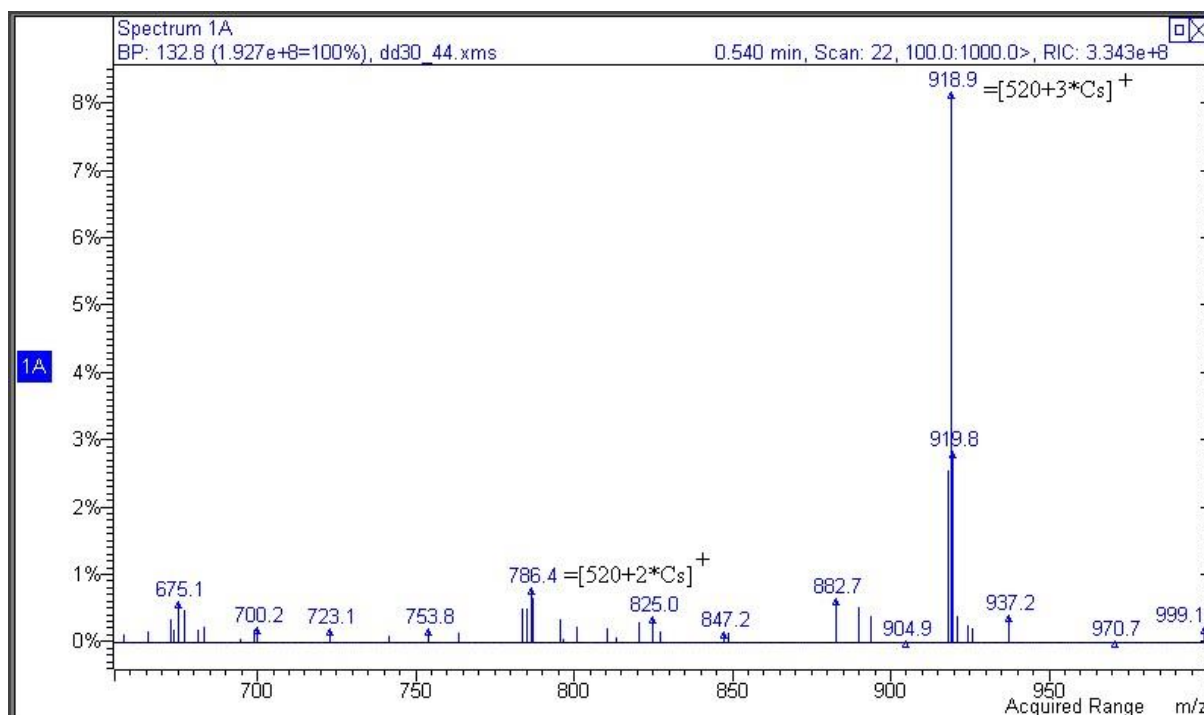

(a)

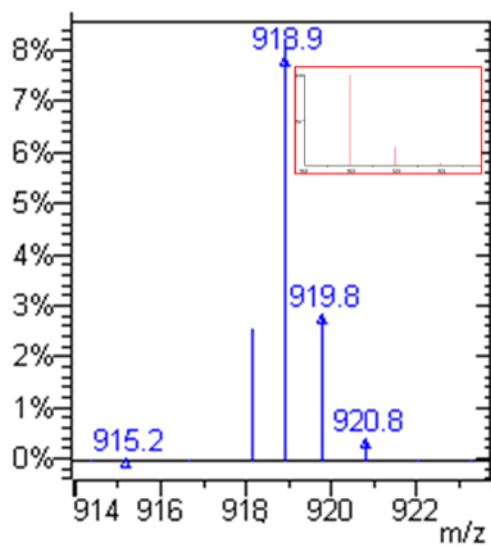

(b)

**Fig. S10.** (a) Positive-ion ESI mass spectrum of **4** in dmso. (b) Experimental and simulated (insert) isotope patterns for the cationic fragment  $\{[(VO_2)_2(L)]+3Cs\}^+$  ( $m/z$  919) in **4**.

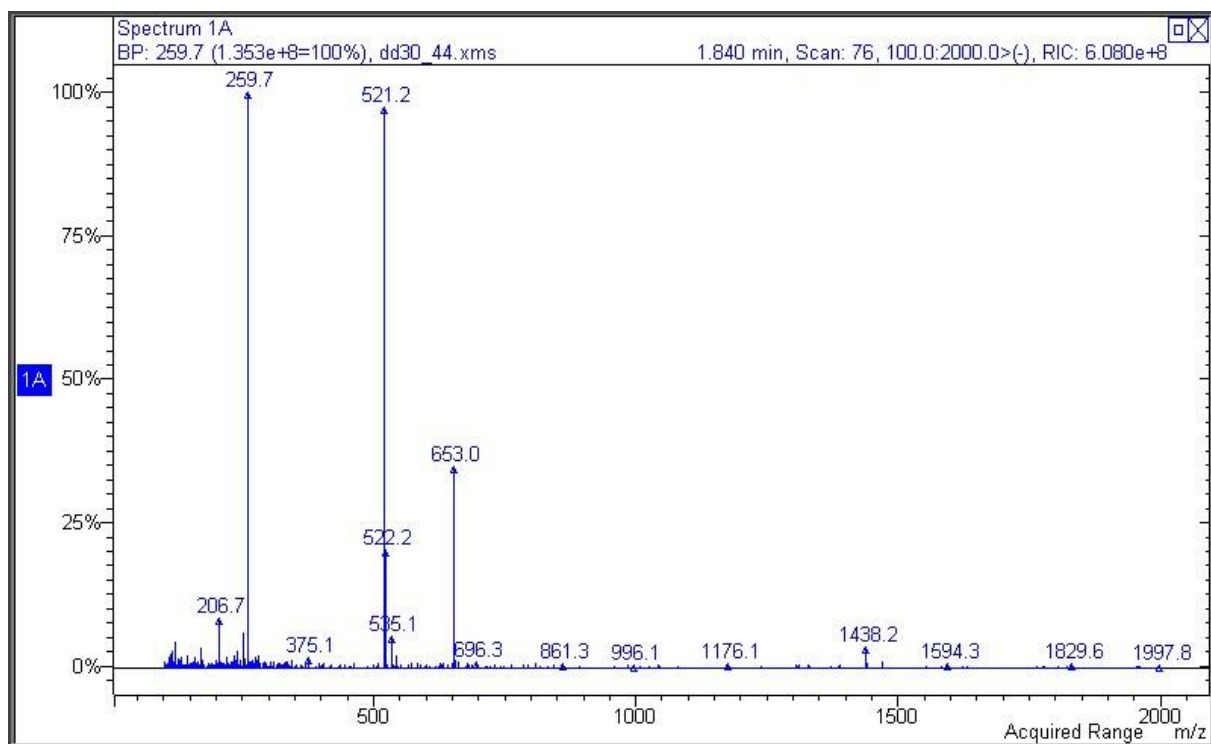

(a)

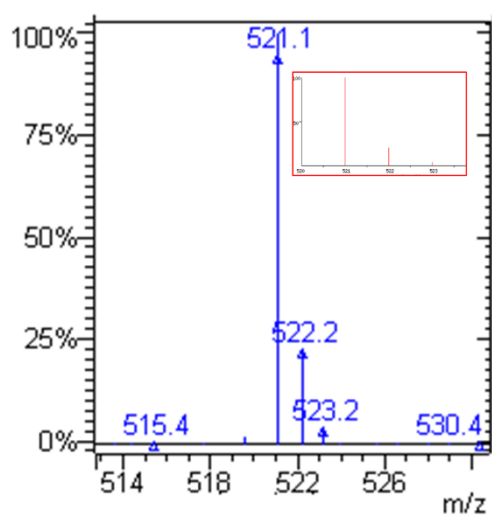

(b)

**Fig. S11.** (a) Negative-ion ESI mass spectrum of **4** in dmso. (b) Experimental and simulated (insert) isotope patterns for the anionic fragment  $[(VO_2)_2(HL)]^-$  ( $m/z$  521) in **4**.

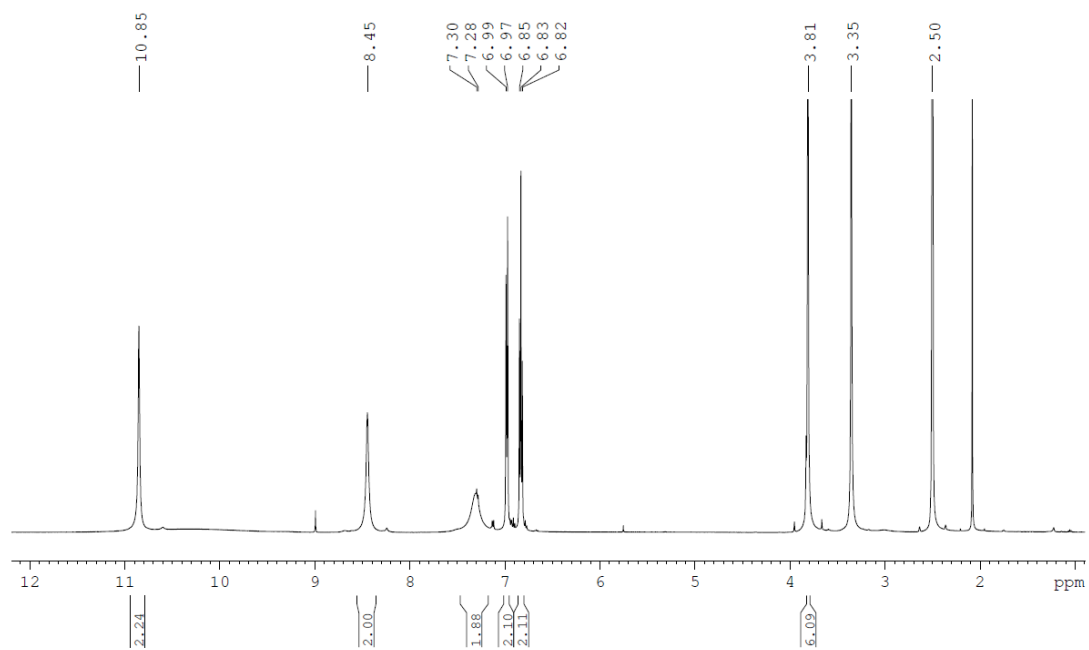

**Fig. S12.**  $^1\text{H}$  NMR spectrum of 1,5-bis(2-hydroxy-3-methoxybenzylidene)carbohydrazide (H<sub>4</sub>L).

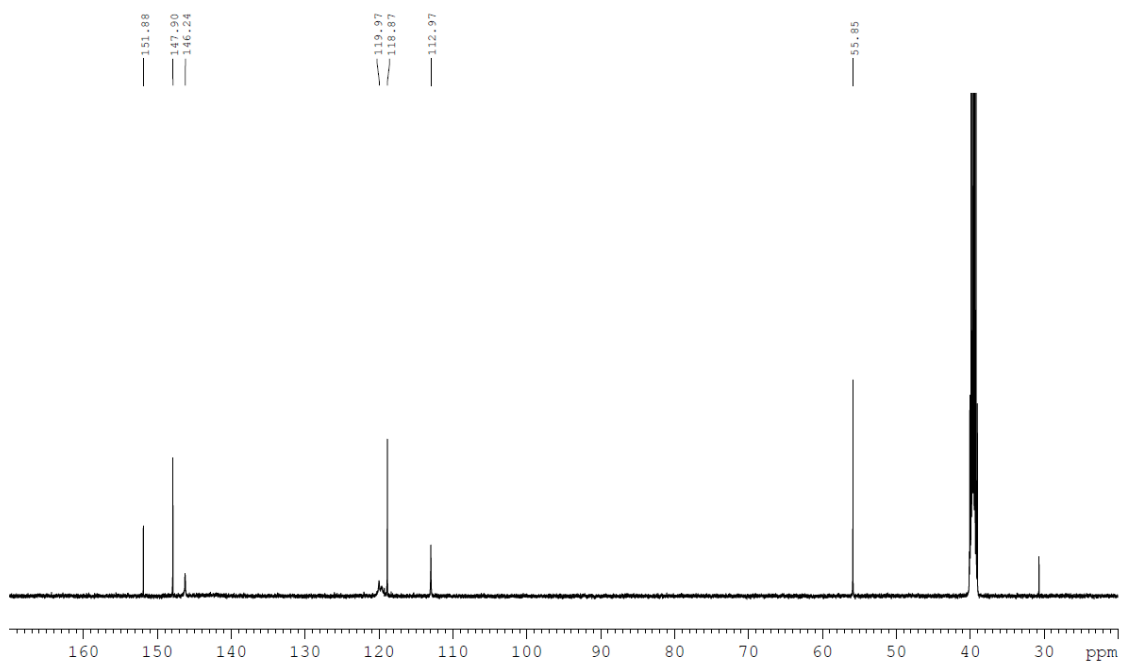

**Fig. S13.**  $^{13}\text{C}$  NMR spectrum of 1,5-bis(2-hydroxy-3-methoxybenzylidene)carbohydrazide (H<sub>4</sub>L).

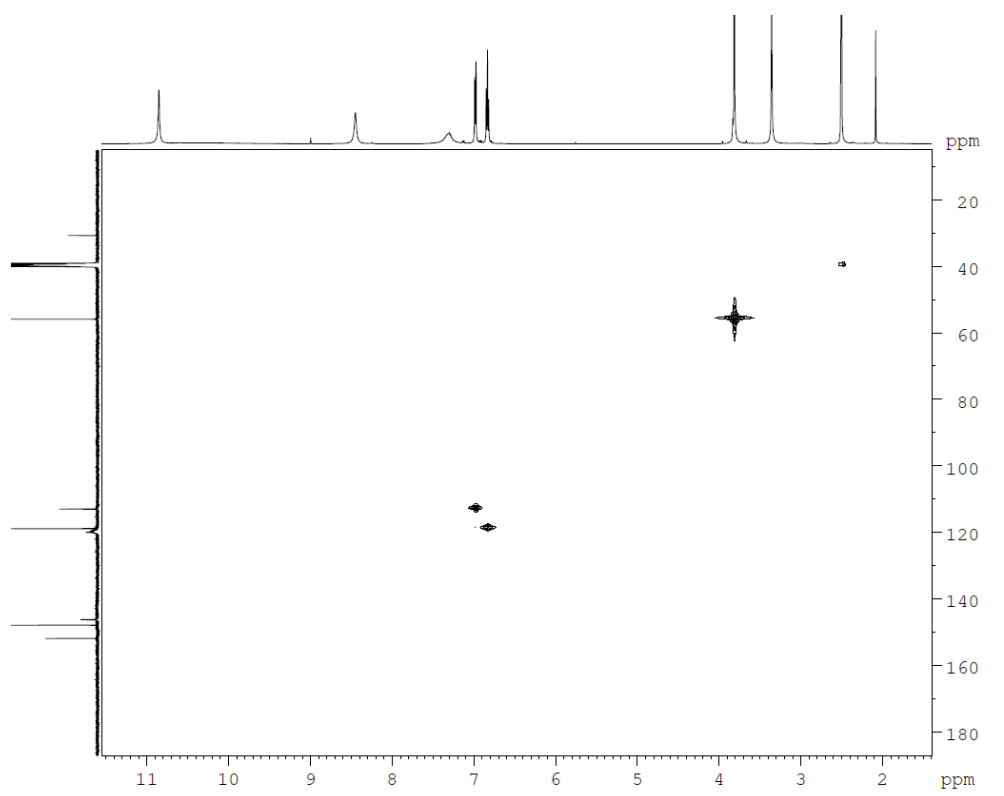

**Fig. S14.**  $^1\text{H}/^{13}\text{C}$  qHSQC NMR spectrum of H<sub>4</sub>L.

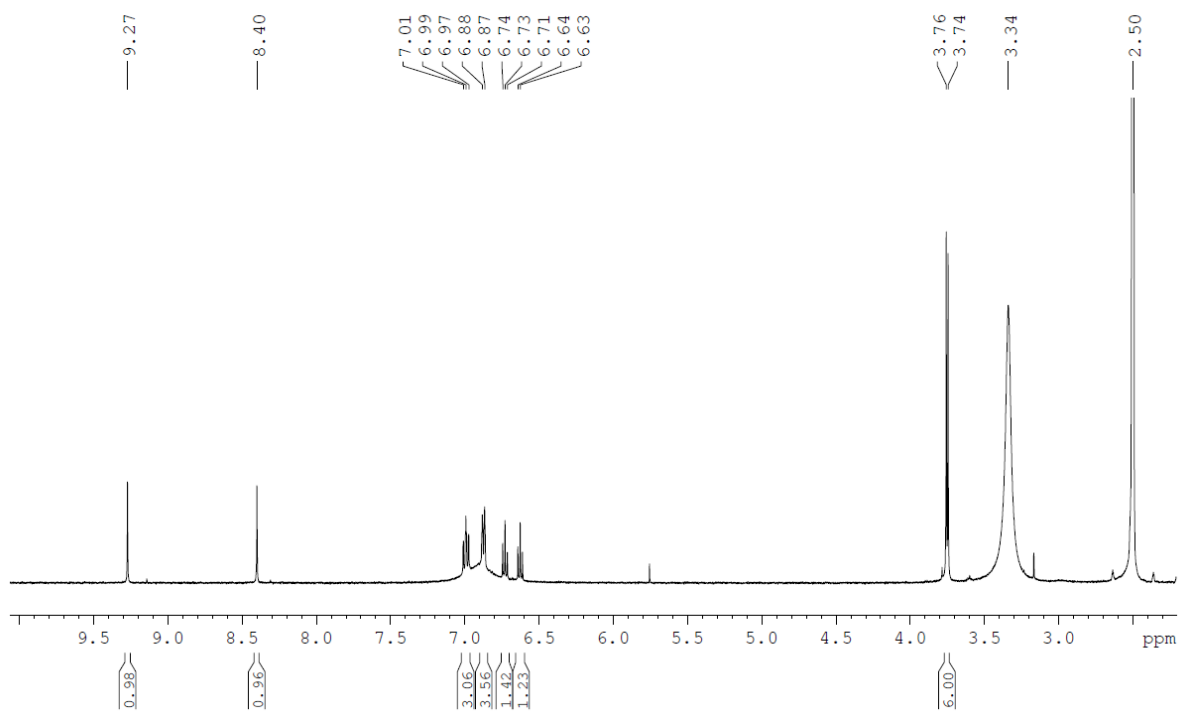

**Fig. S15.**  $^1\text{H}$  NMR spectrum of **1**.

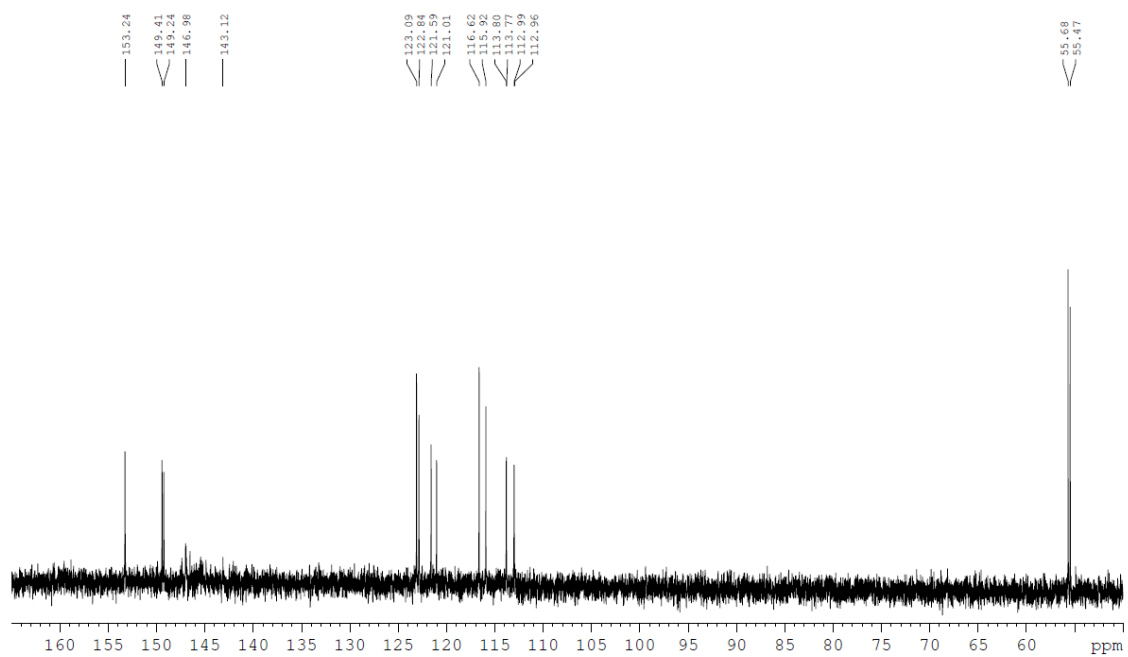

**Fig. S16.**  $^{13}\text{C}$  NMR spectrum of **1**.

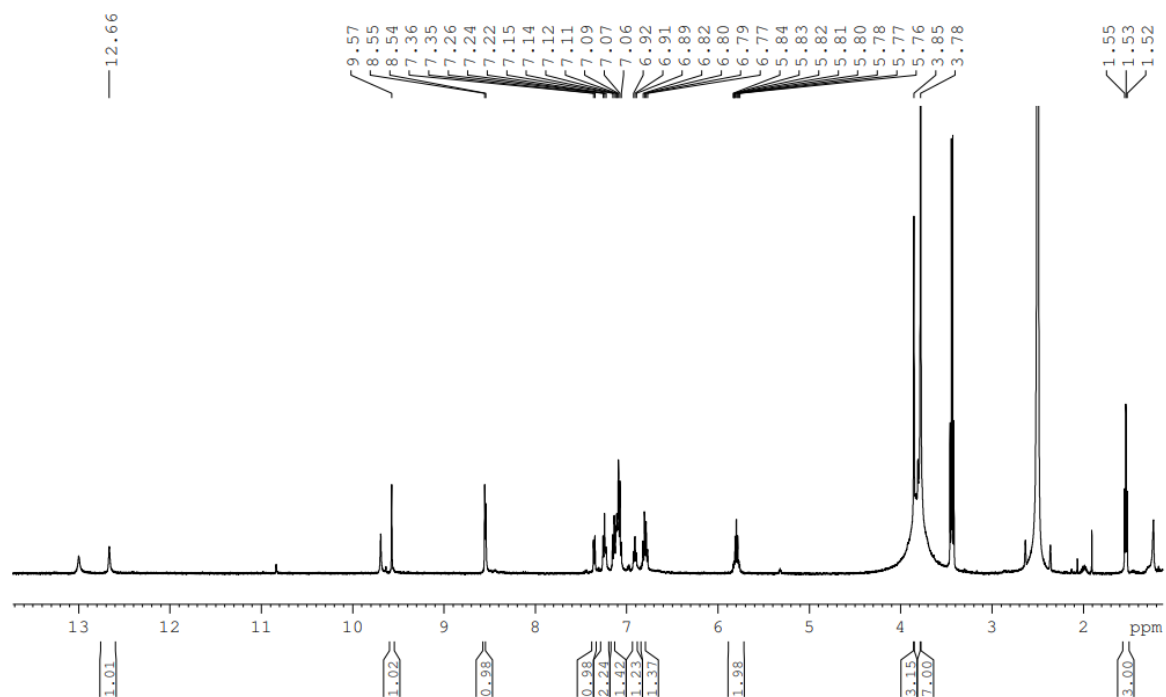

**Fig. S17.**  $^1\text{H}$  NMR spectrum of **2**.

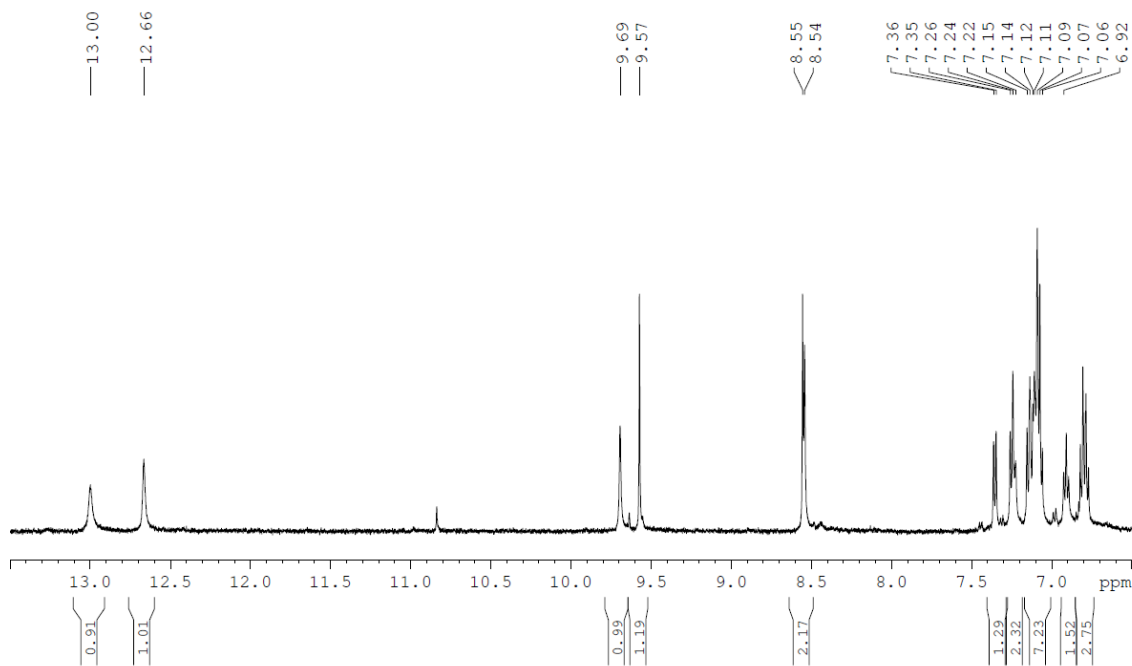

**Fig. S18.**  $^1\text{H}$  NMR spectrum of **2** (showing hydrazinic protons and aromatic region).

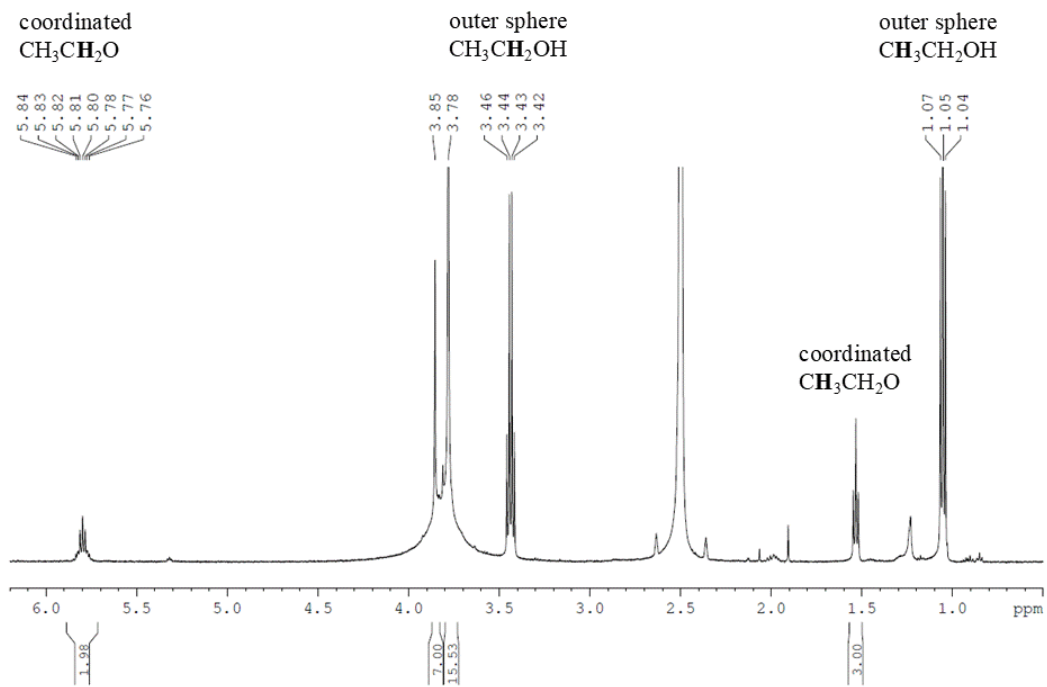

**Fig. S19.**  $^1\text{H}$  NMR spectrum of **2** (aliphatic region).

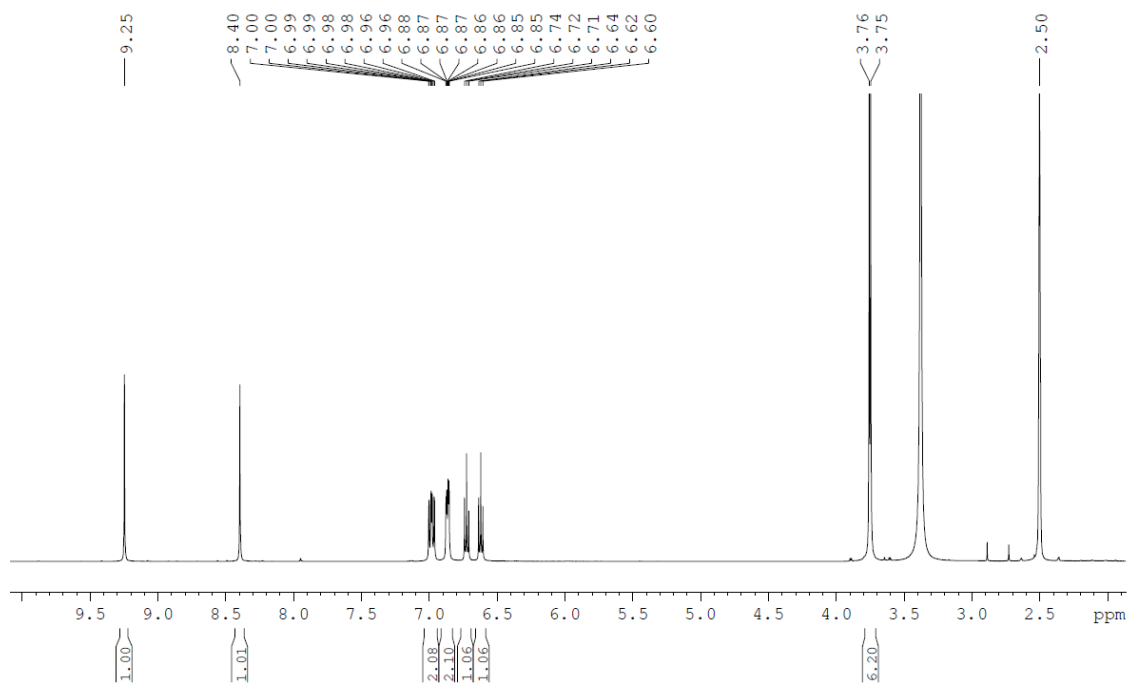

**Fig. S20.**  $^1\text{H}$  NMR spectrum of **3**.

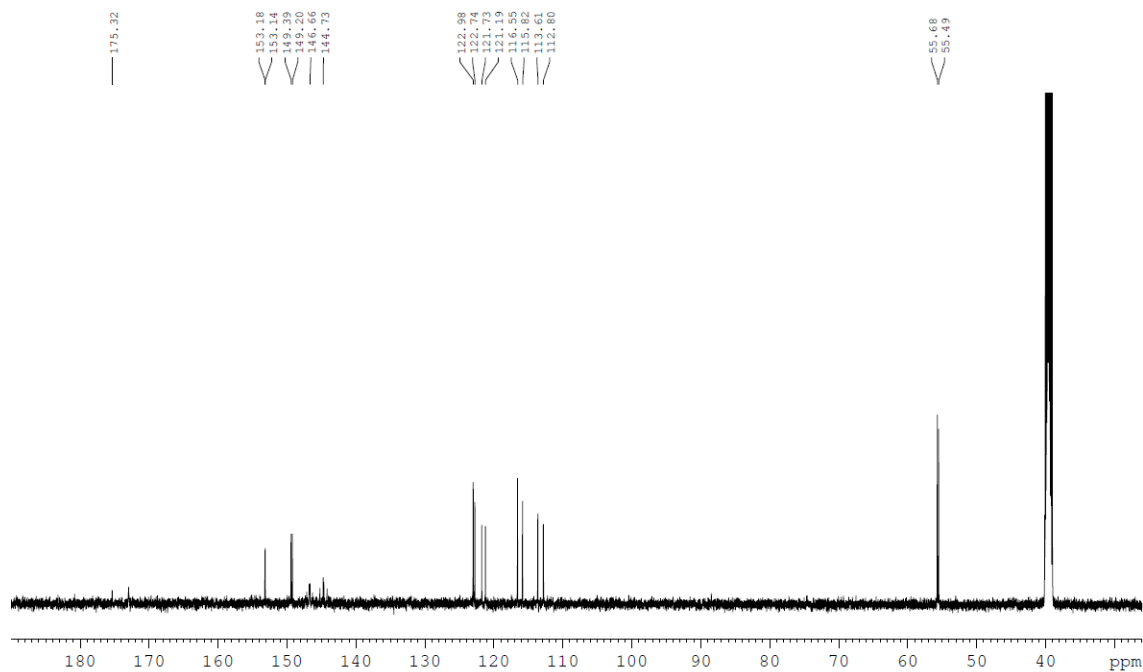

**Fig. S21.**  $^{13}\text{C}$  NMR spectrum of **3**.

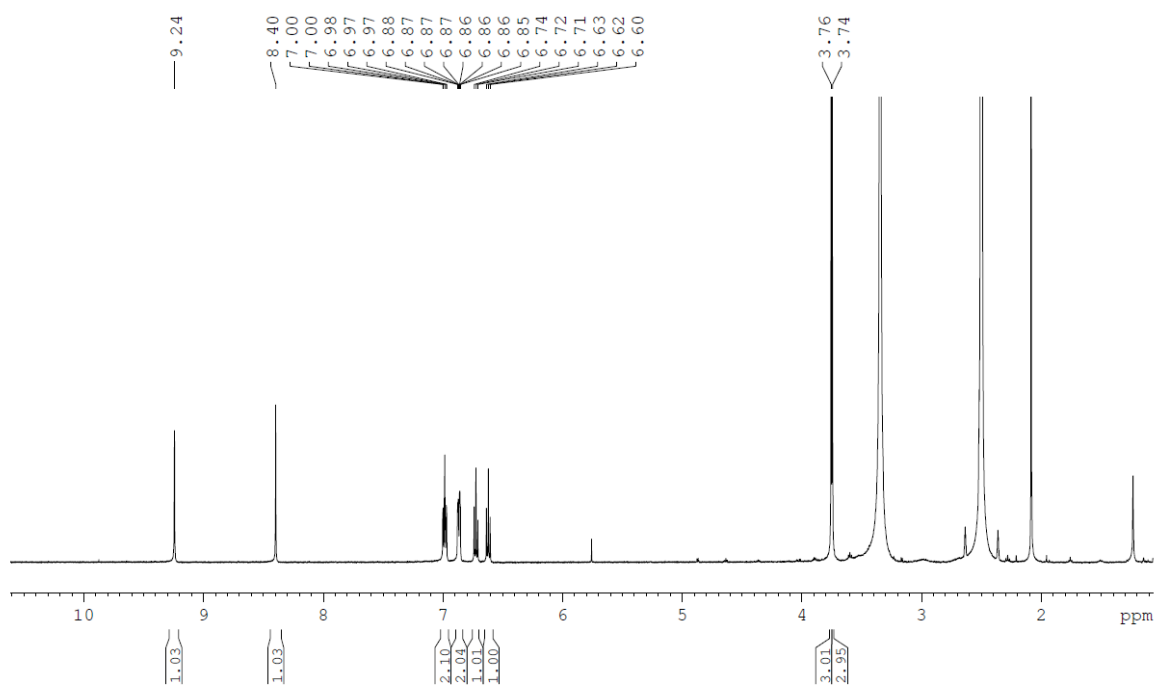

Fig. S22.  $^1\text{H}$  NMR spectrum of 4.

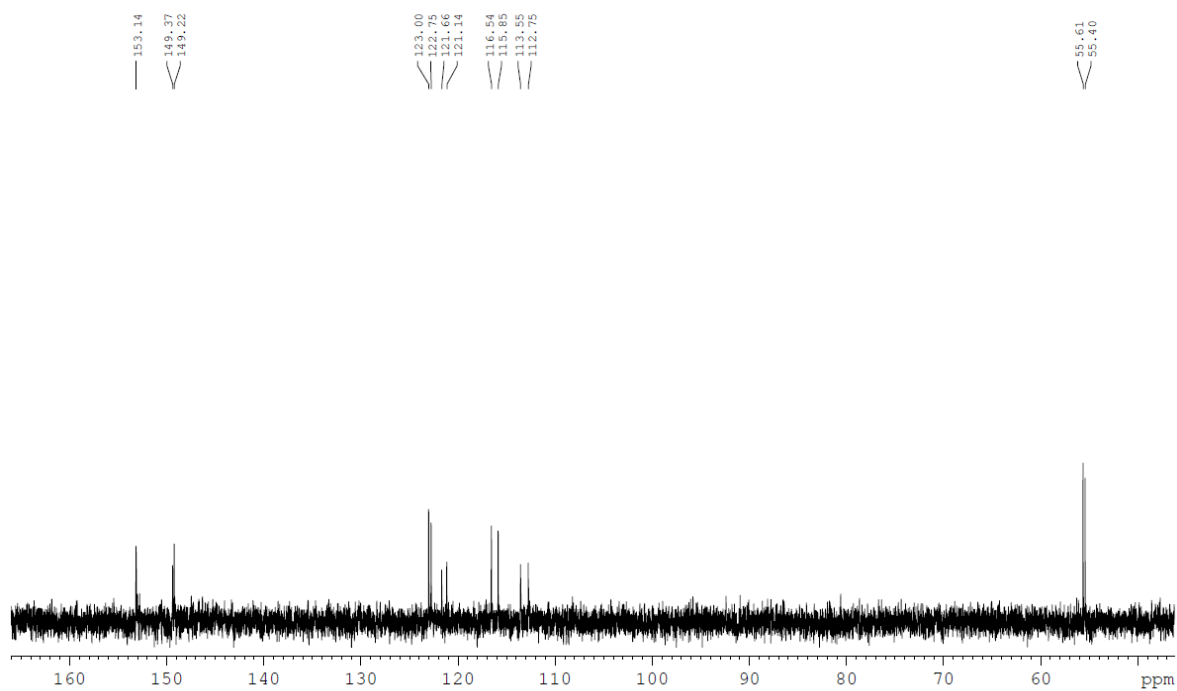

Fig. S23.  $^{13}\text{C}$  NMR spectrum of 4.

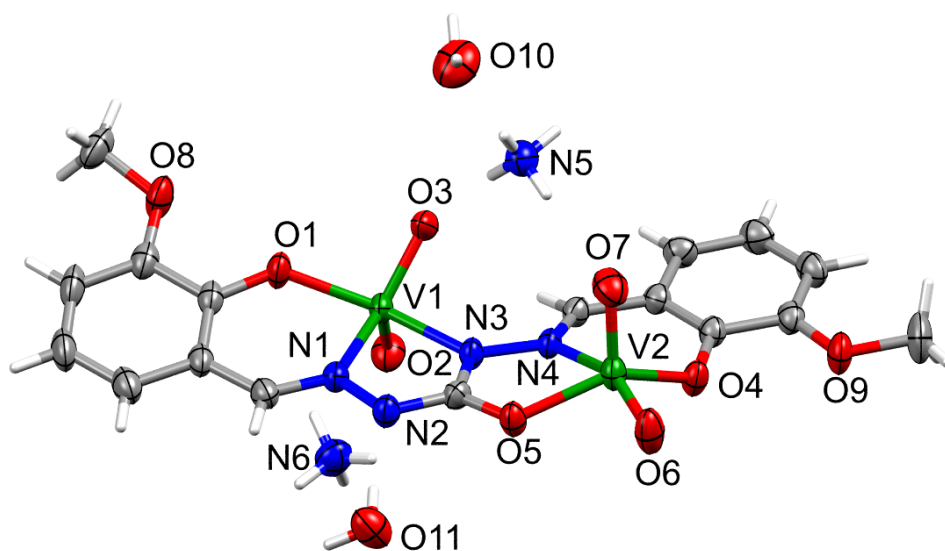

**Fig. S24.** The asymmetric unit of **1** with thermal ellipsoids shown at the 50% probability level and partial atom numbering.

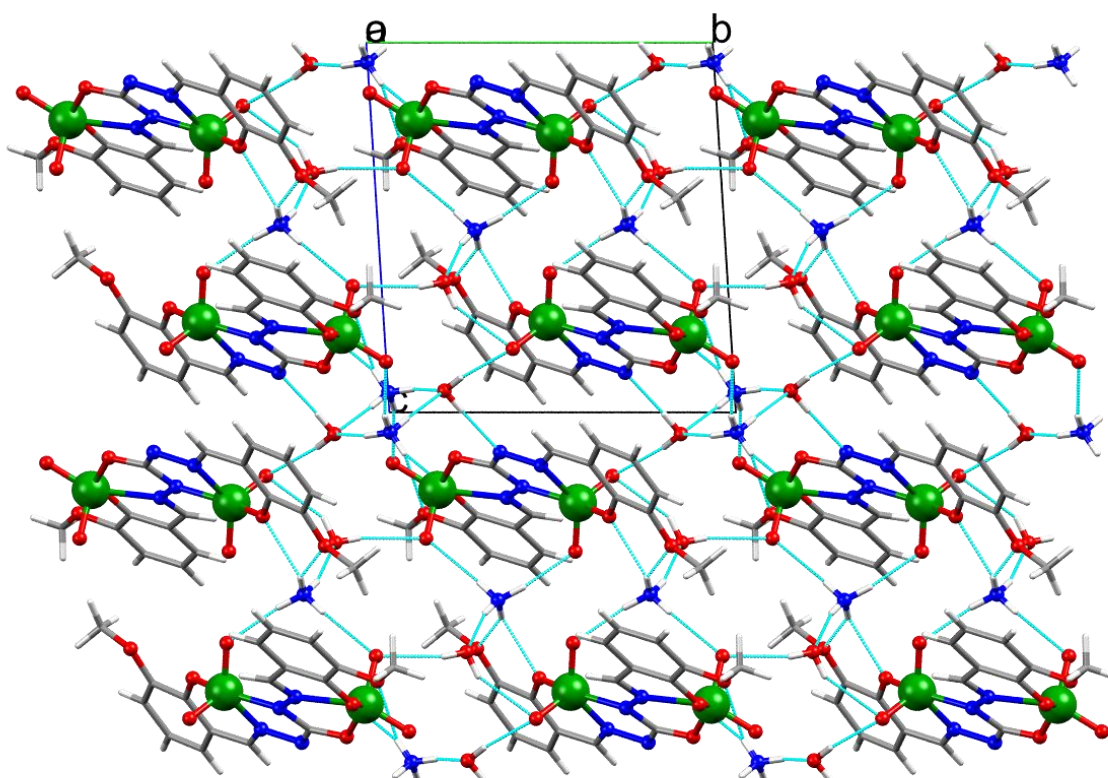

**Fig. S25.** 3D supramolecular network formed via N-H...O and O-H...O intermolecular hydrogen bonds in **1**.

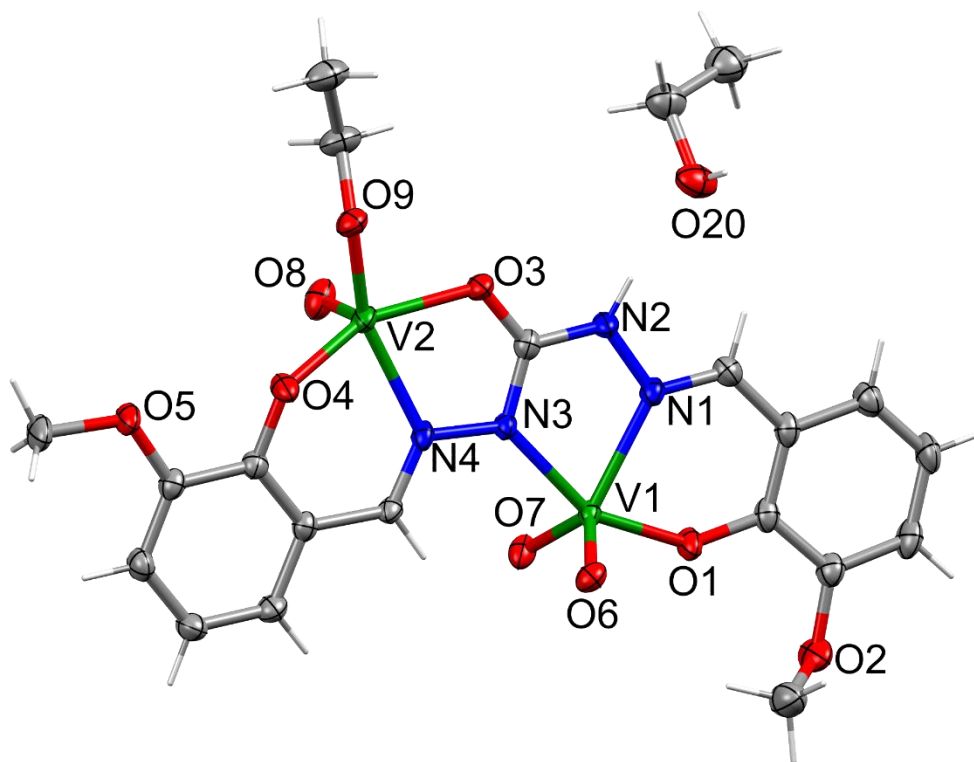

**Fig. S26.** The asymmetric unit of **2** with thermal ellipsoids shown at the 50% probability level and partial atom numbering.

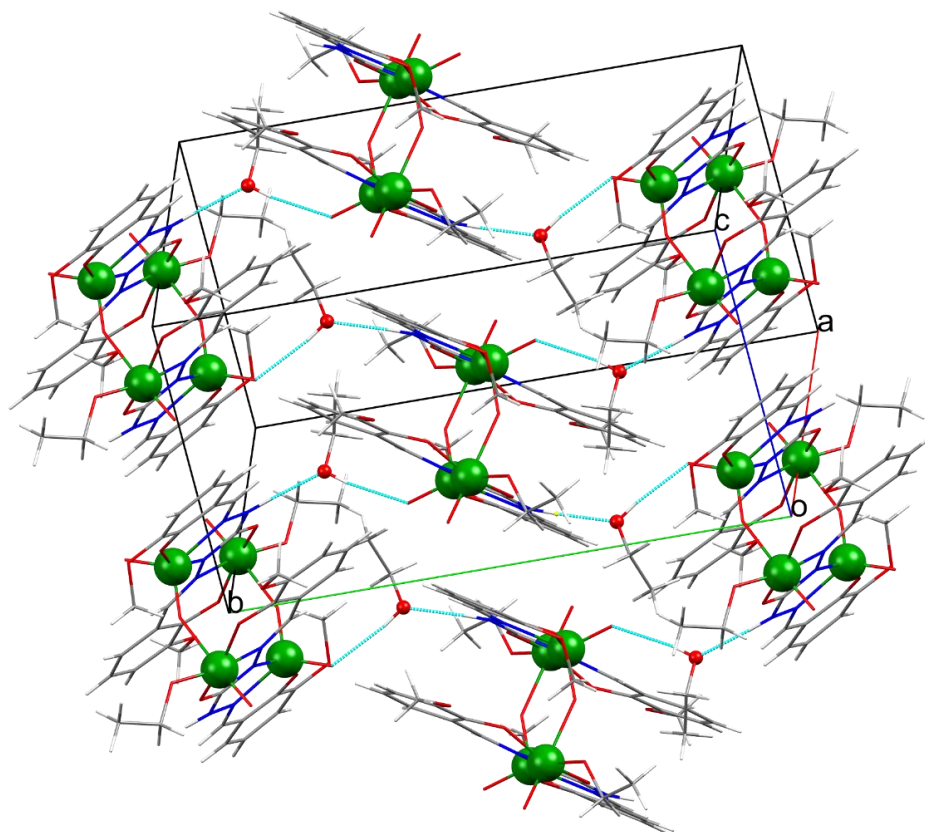

(a)

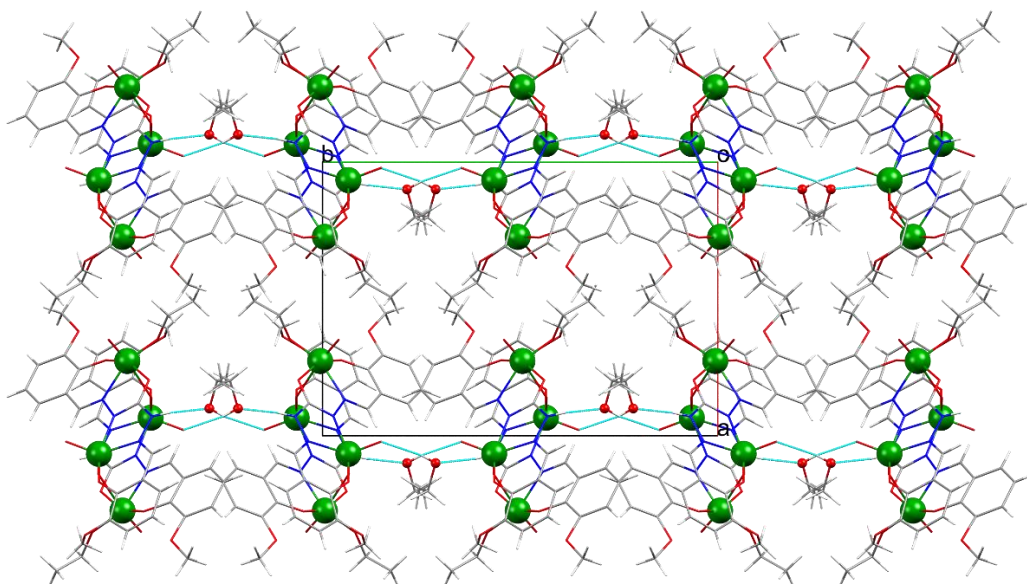

(b)

**Fig. S27.** The supramolecular layer formed via O–H...O and N–H...O hydrogen bonds between solvent EtOH molecules and tetranuclear V(V) clusters in **2** (a). The fragment of crystal structure of **2** viewed along the *b* axis (b). Hydrogen bonds are shown as blue dotted lines.

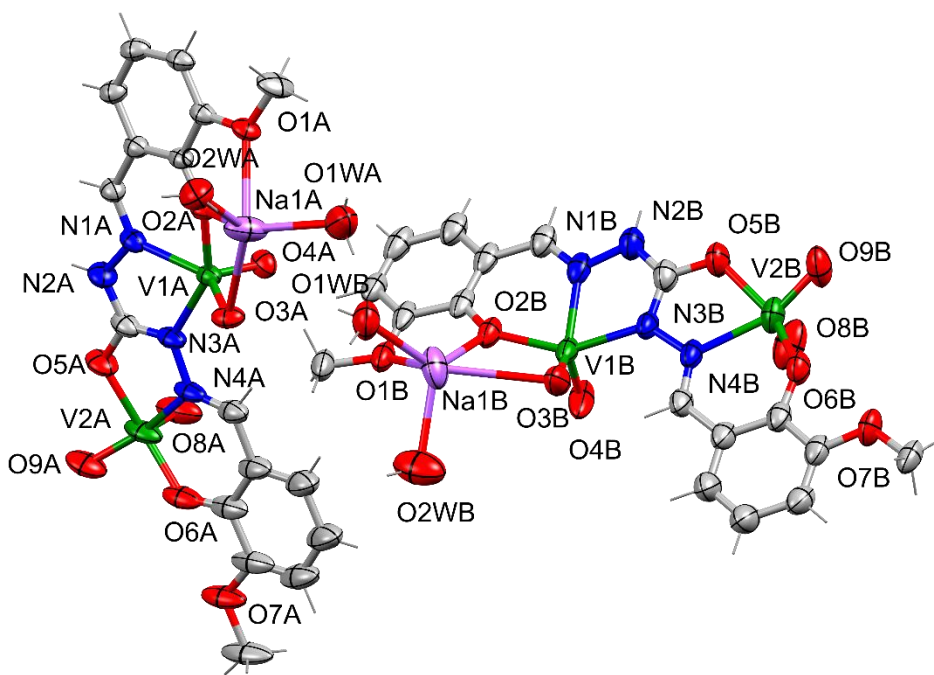

(a)

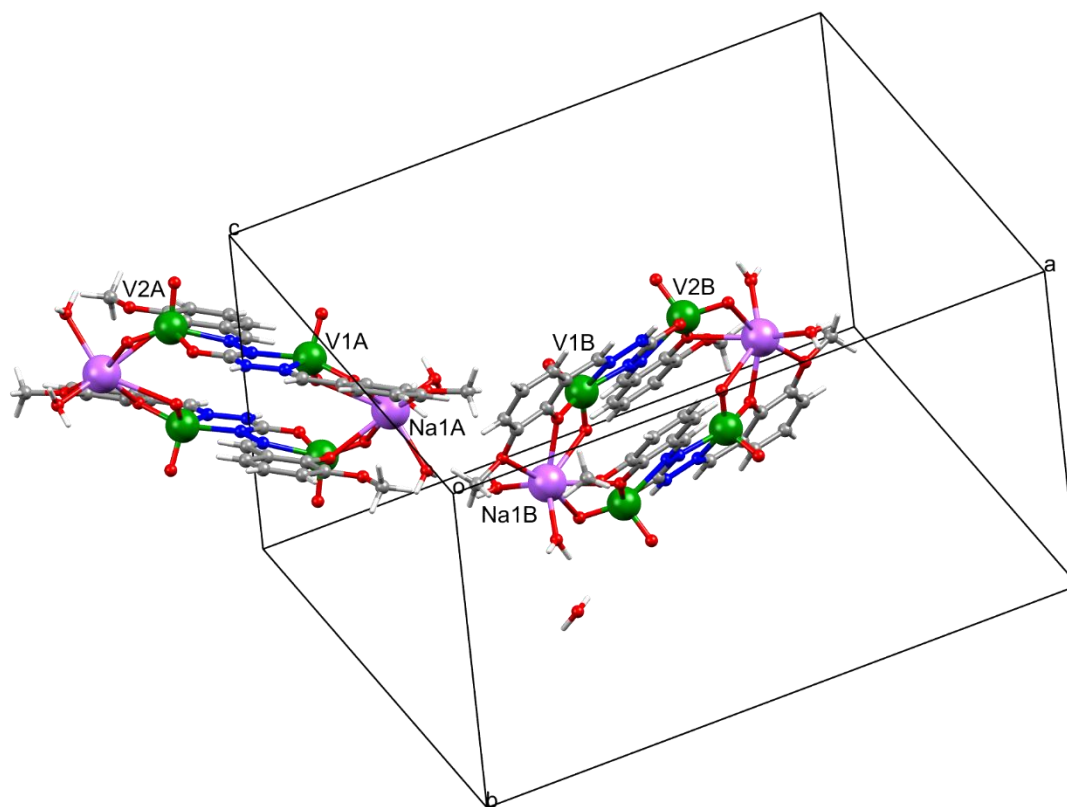

(b)

**Fig. S28.** The asymmetric unit of **3** with thermal ellipsoids shown at the 50% probability level (a). View of two crystallographic independent centrosymmetric neutral hexanuclear  $[\text{Na}_2(\text{H}_2\text{O})_4(\text{VO}_2)_4(\text{HL})_2]$  clusters, denoted as A and B, and solvent water molecules in the unit cell of **3** (b).

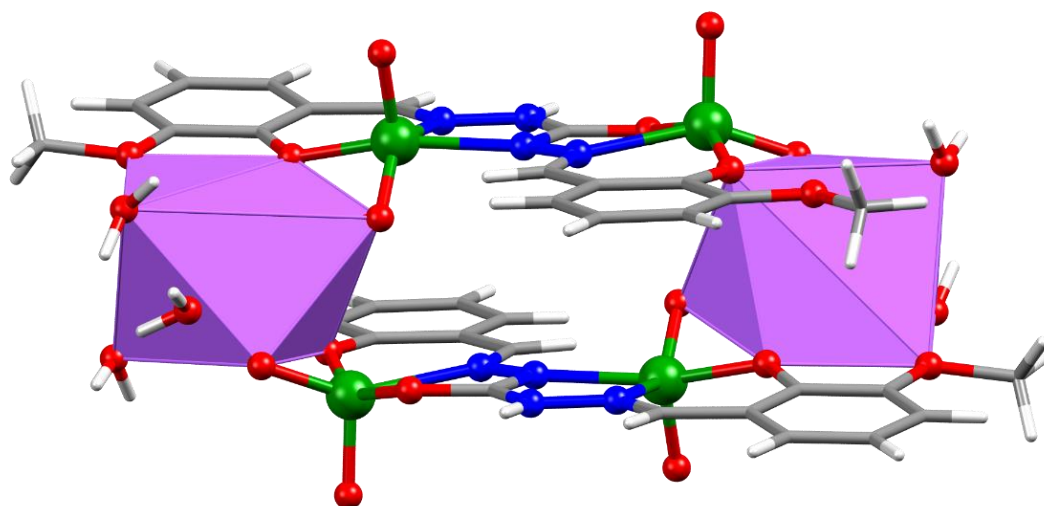

(a)

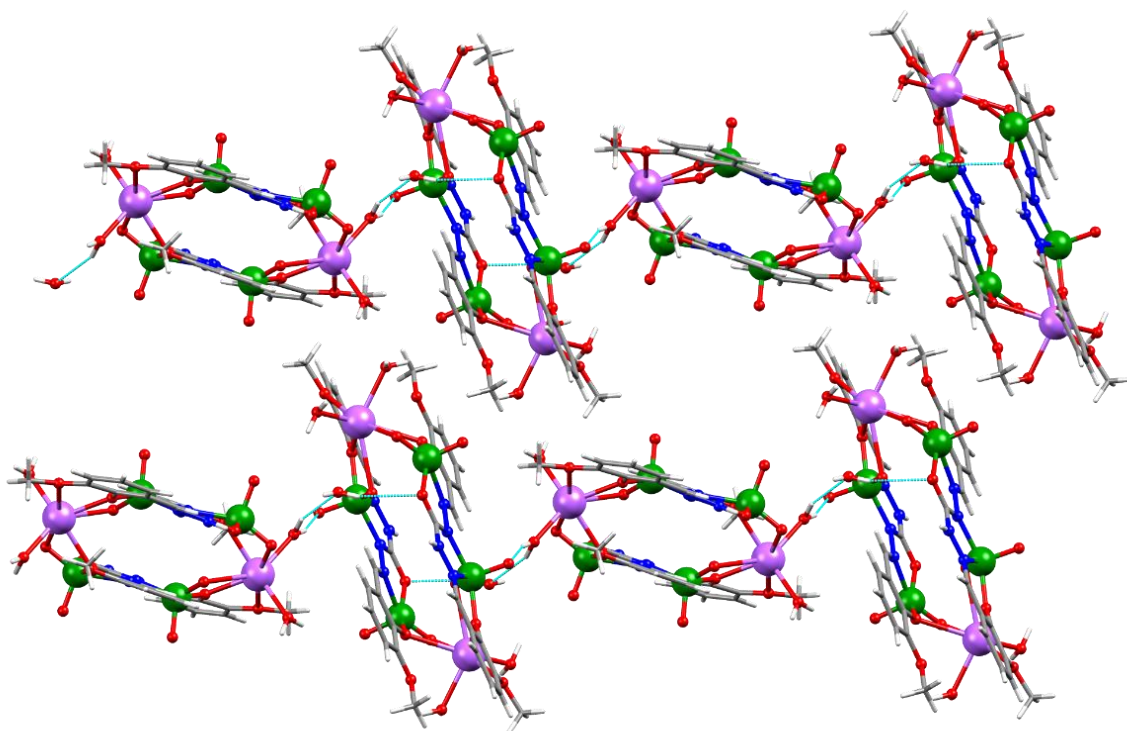

**Fig. S29.** View of a vanadium-based hexanuclear cluster with  $\text{Na}^+$  cations highlighted in polyhedral mode formed in **3** (a). View of H-bonded chains formed in **3**. Hydrogen bonds are shown as blue dotted lines (b).

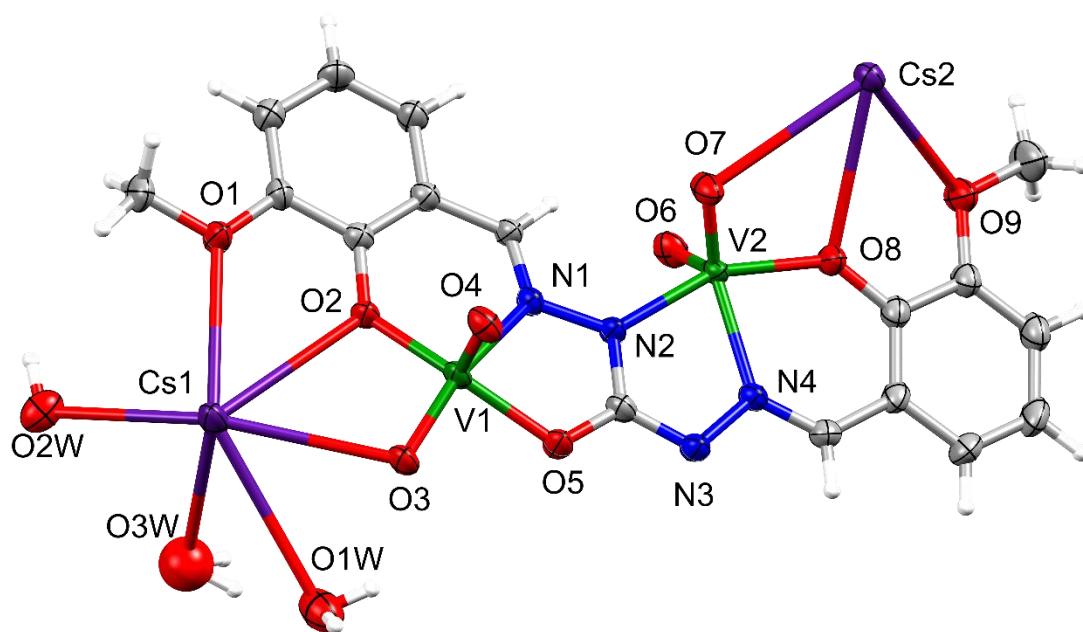

(a)

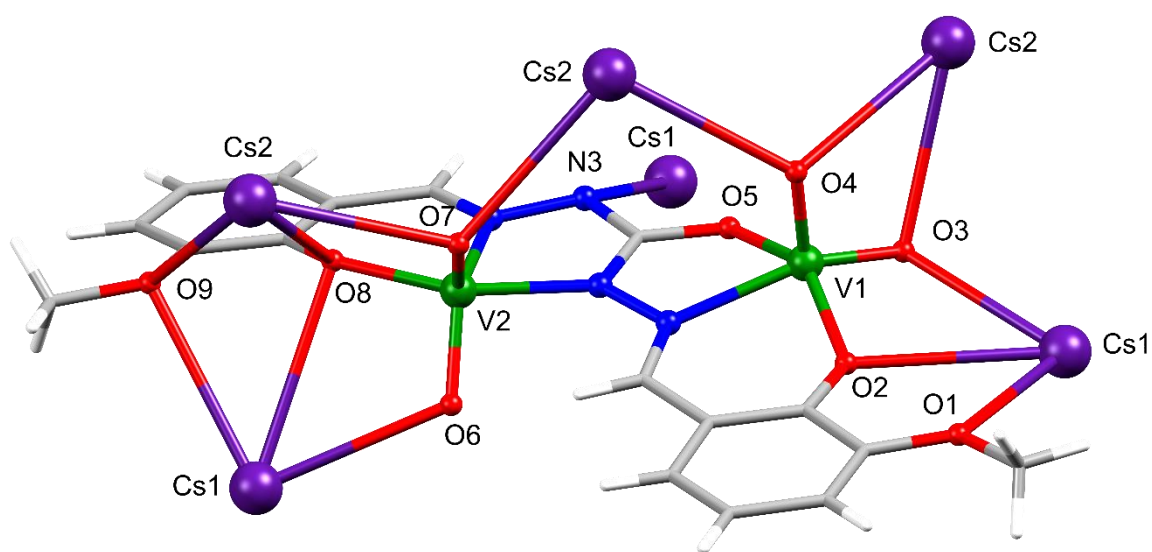

(b)

**Fig. S30.** The asymmetric unit of **4** with thermal ellipsoids shown at the 50% probability level and partial atom numbering (a). View of the  $[(VO_2)_2(L)]^{2-}$  unit showing the coordination of all O and N donor sites of  $L^{4-}$  to the metal centers in the 3D polymeric structure of **4**.

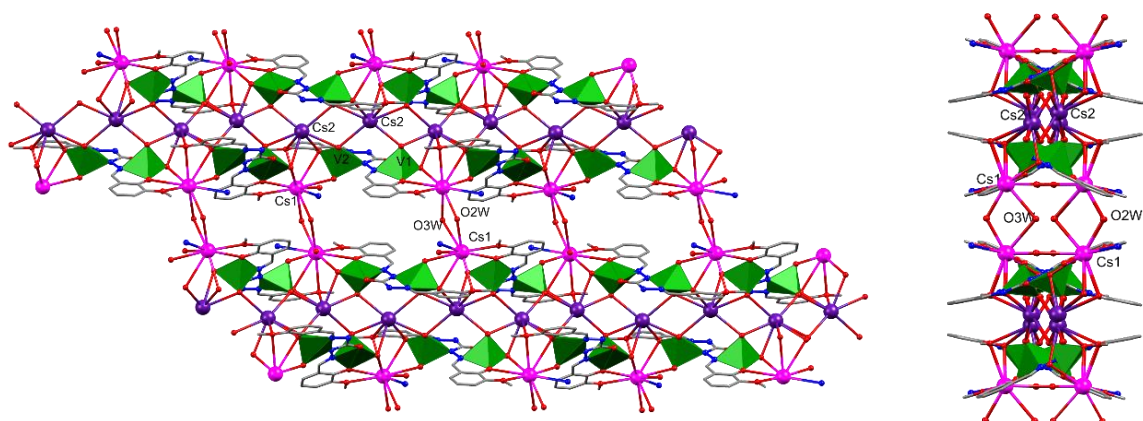

(a)

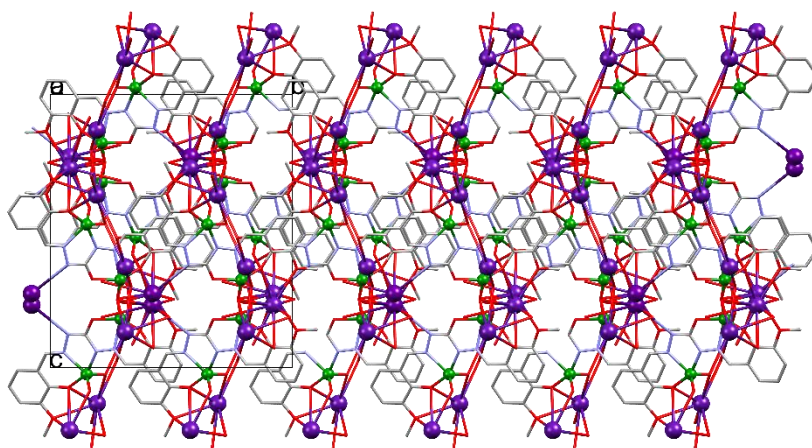

(b)

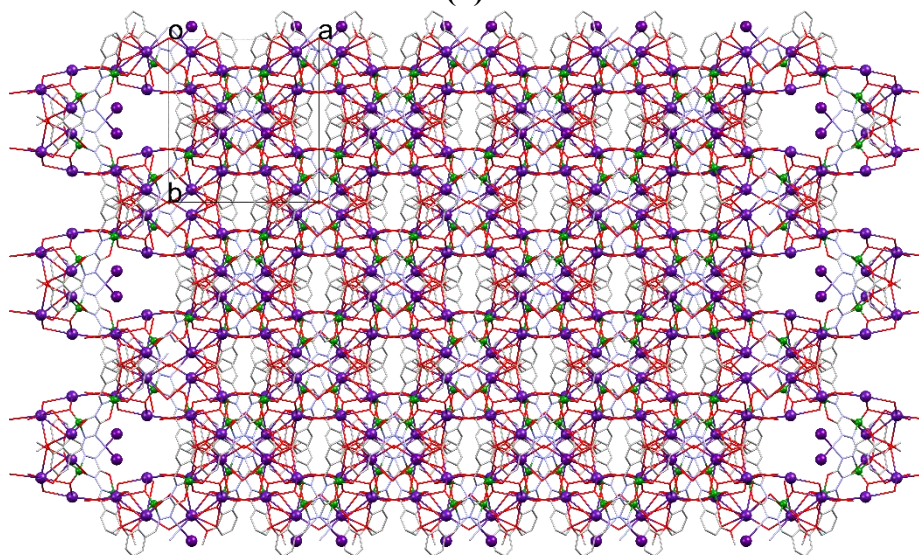

(c)

**Fig. S31.** Front and side views of the layers in **4**. Cs1 and Cs2 atoms are shown as pink and violet spheres, respectively, while V atoms are represented as green polyhedra (a). View of the 3D framework of **4** along the *a* axis (b) and the *c* axis (c).

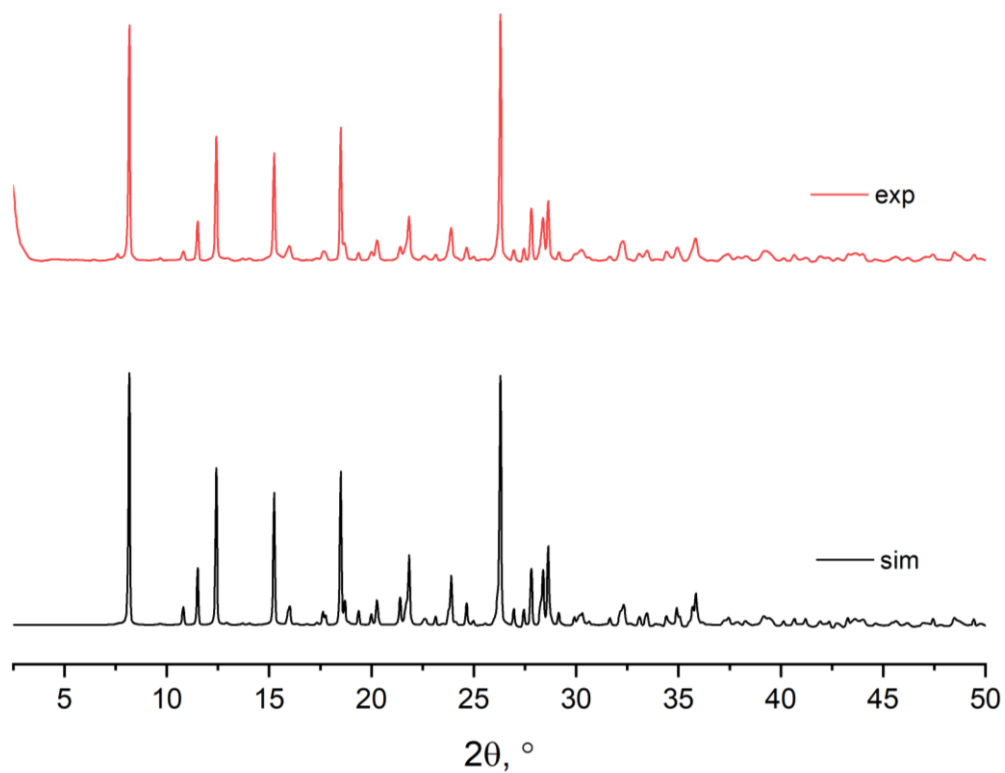

(a)

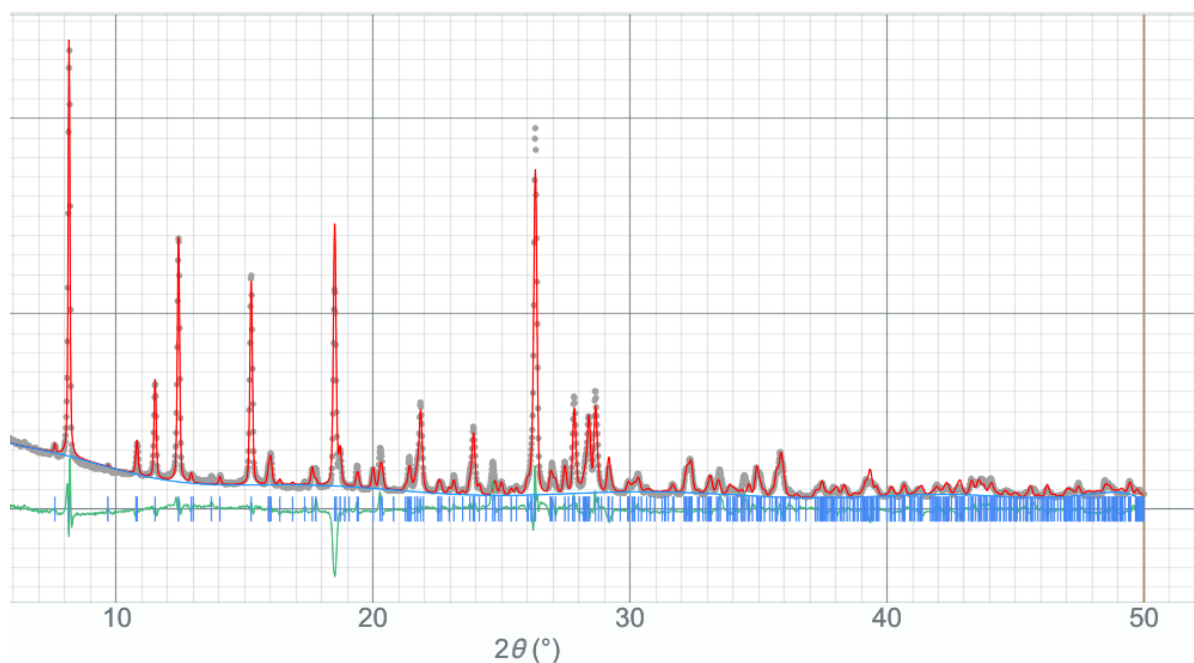

(b)

**Fig. S32.** (a) Experimental PXRD pattern of compound **1** compared with the simulated pattern from single-crystal X-ray diffraction. (b) Rietveld refinement plot of **1** using the single-crystal structure as the starting model. Observed intensities are shown as grey symbols, the calculated pattern as red solid line, and the difference curve ( $I_{\text{obs}} - I_{\text{calc}}$ ) is shown at the bottom as green line. Vertical tick marks represent the Bragg positions.

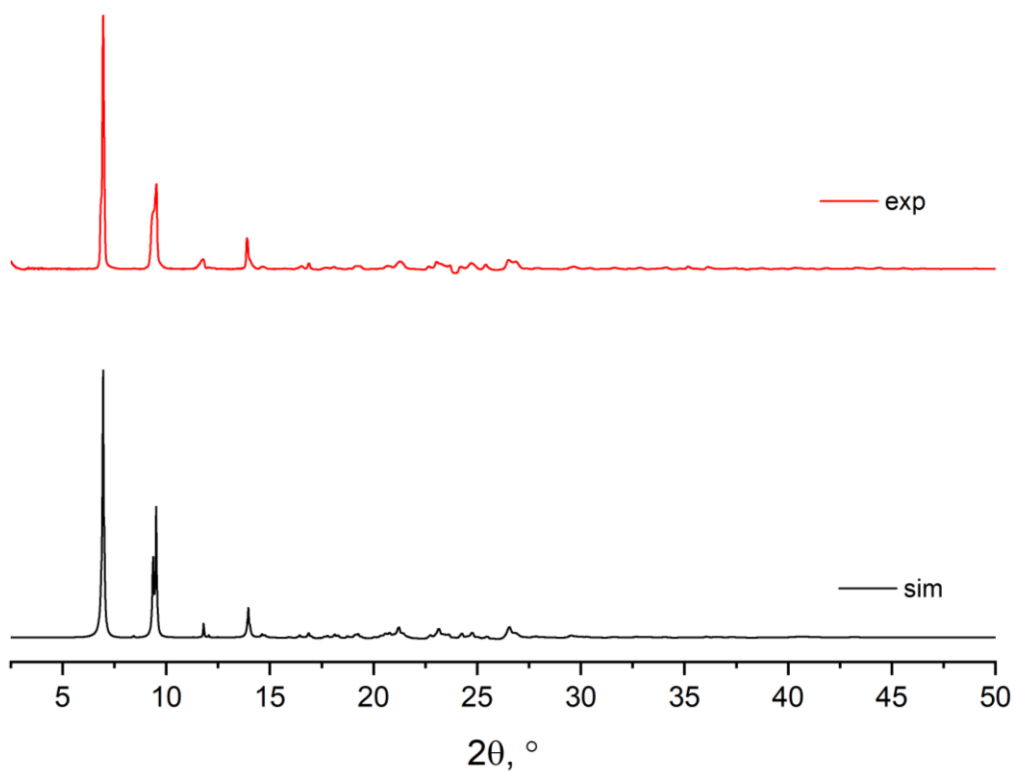

(a)

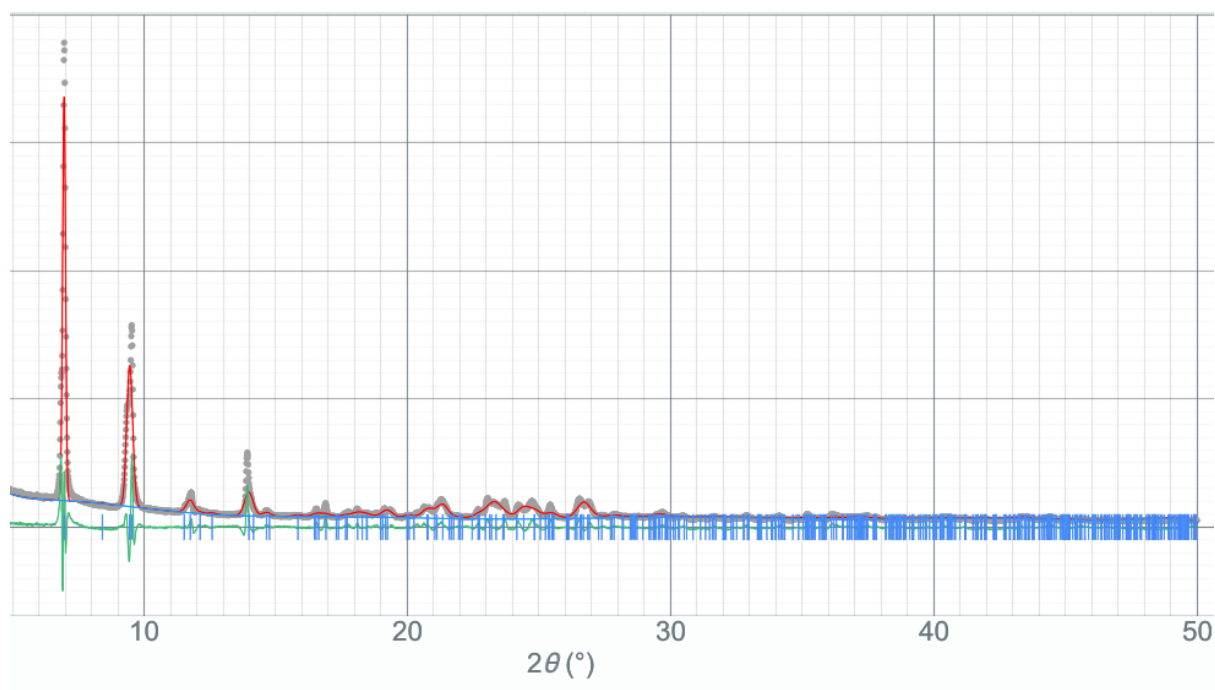

(b)

**Fig. S33.** (a) Experimental PXRD pattern of compound **2** compared with the simulated pattern from single-crystal X-ray diffraction. (b) Rietveld refinement plot of **2** using the single-crystal structure as the starting model. Observed intensities are shown as grey symbols, the calculated pattern as red solid line, and the difference curve ( $I_{\text{obs}} - I_{\text{calc}}$ ) is shown at the bottom as green line. Vertical tick marks represent the Bragg positions.

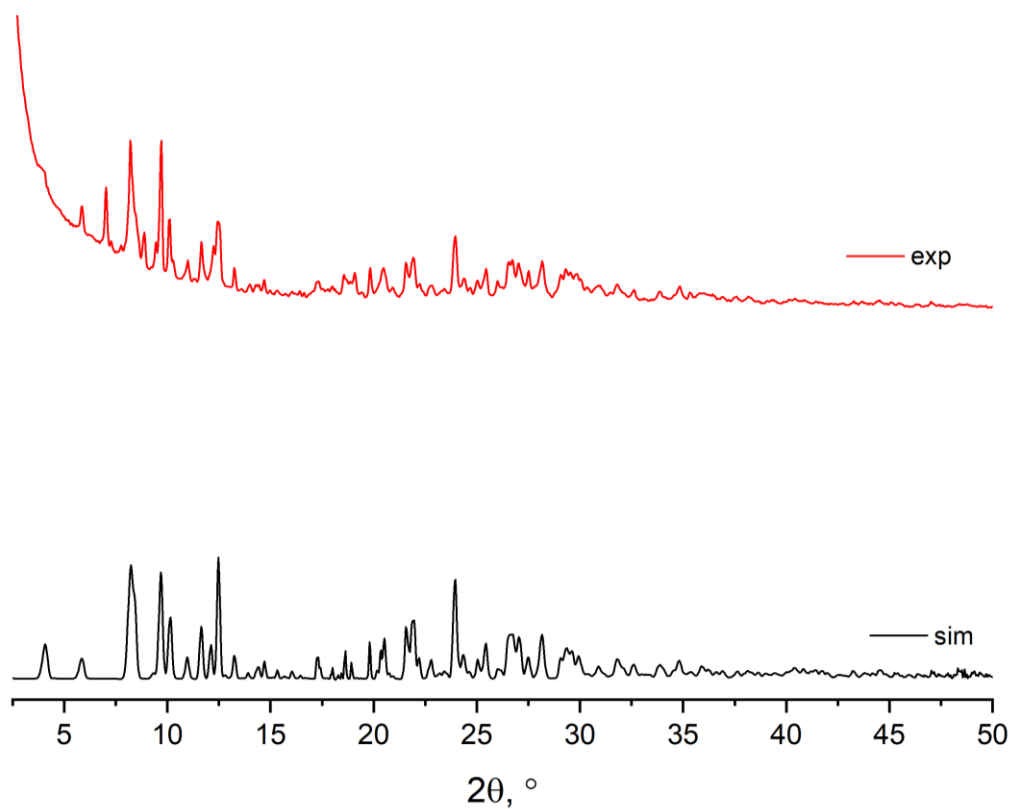

(a)

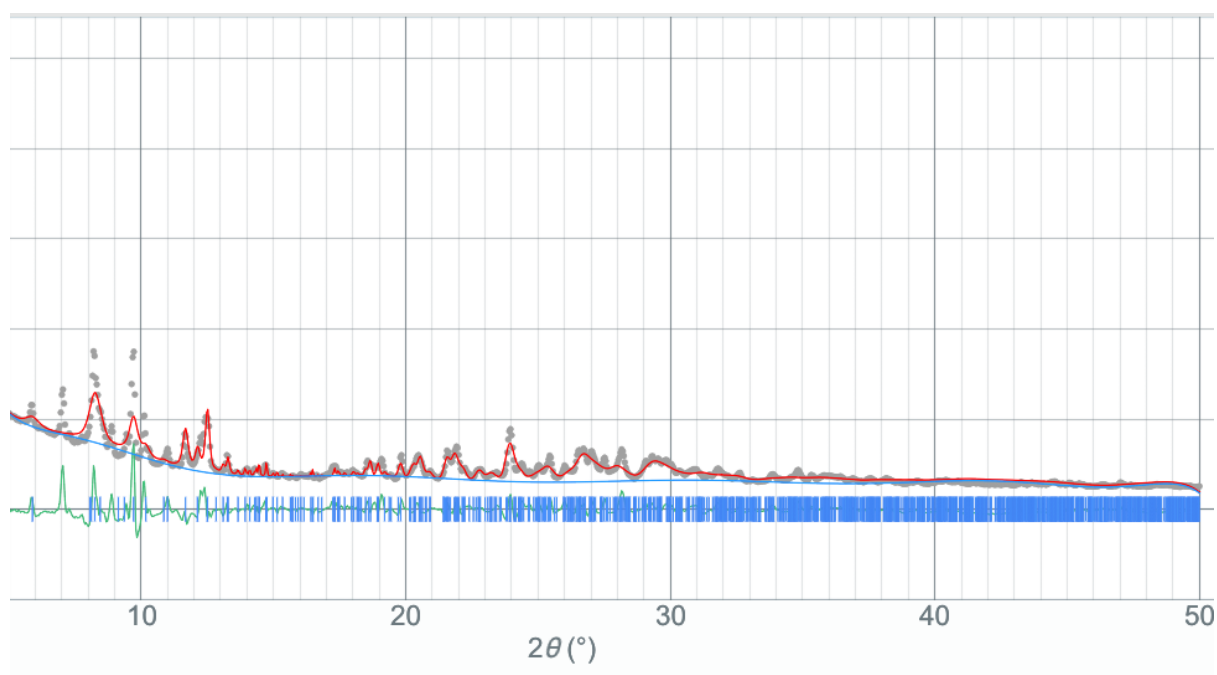

(b)

**Fig. S34.** (a) Experimental PXRD pattern of compound **3** compared with the simulated pattern from single-crystal X-ray diffraction. (b) Rietveld refinement plot of **3** using the single-crystal structure as the starting model. Observed intensities are shown as grey symbols, the calculated pattern as red solid line, and the difference curve ( $I_{\text{obs}} - I_{\text{calc}}$ ) is shown at the bottom as green line. Vertical tick marks represent the Bragg positions.

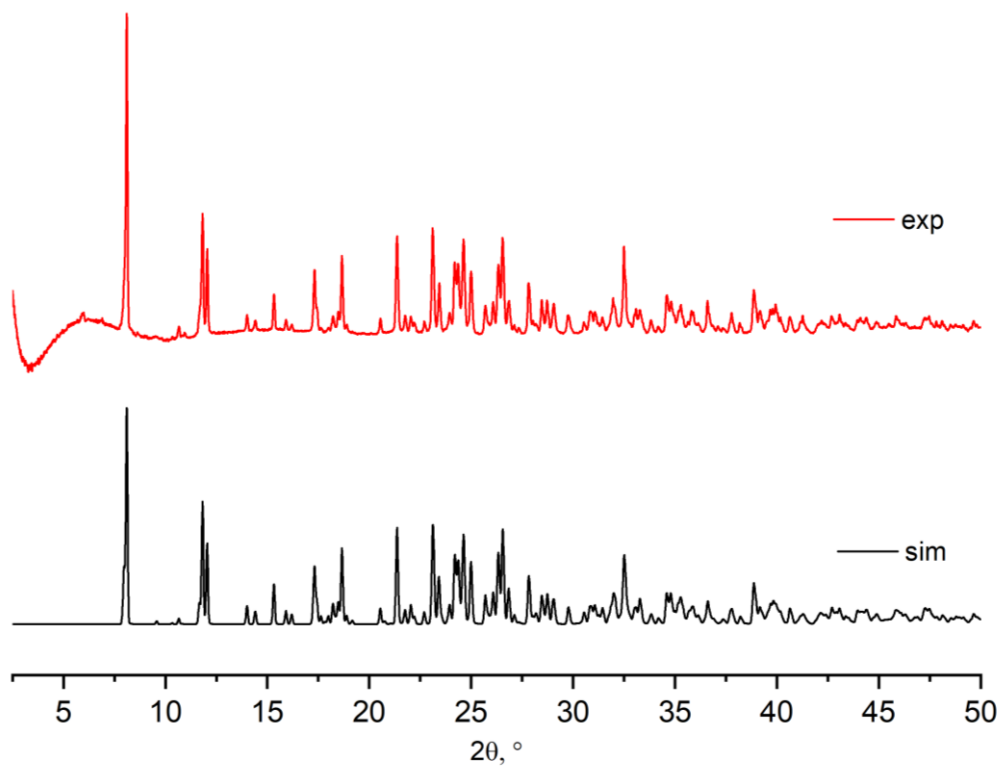

(a)

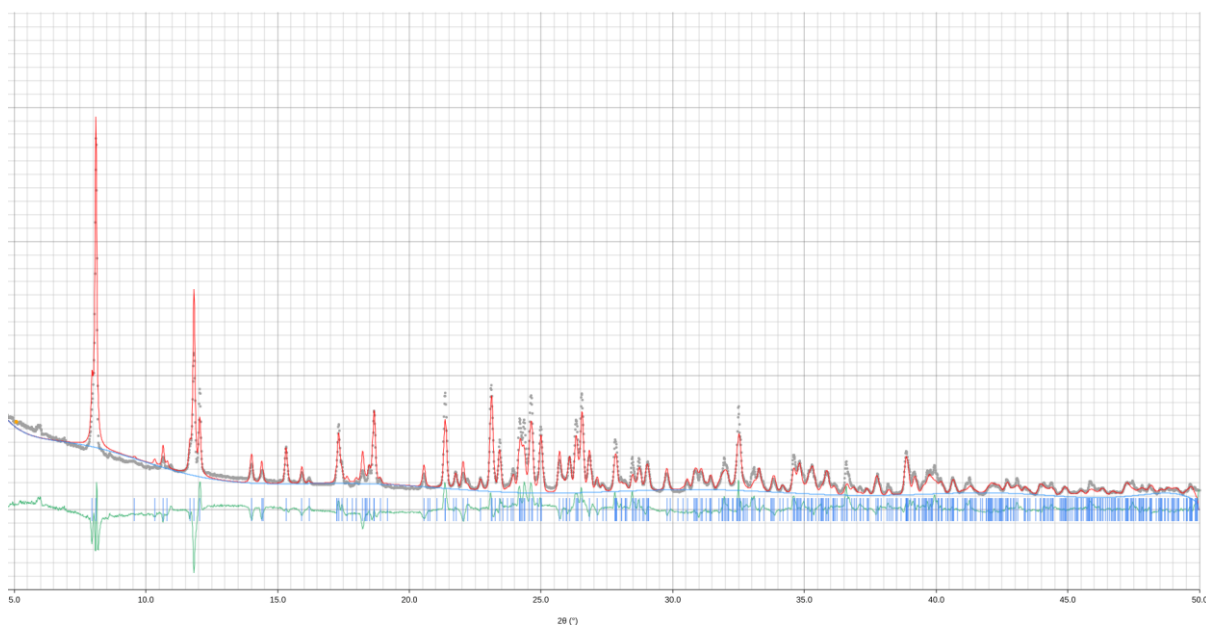

(b)

**Fig. S35.** (a) Experimental PXRD pattern of compound **4** compared with the simulated pattern from single-crystal X-ray diffraction. (b) Rietveld refinement plot of **4** using the single-crystal structure as the starting model. Observed intensities are shown as grey symbols, the calculated pattern as red solid line, and the difference curve ( $I_{\text{obs}} - I_{\text{calc}}$ ) is shown at the bottom as green line. Vertical tick marks represent the Bragg positions.

**Table S1.** Crystal data and details of structural determinations for **1-4**

|                                                      | <b>1</b>                                                                      | <b>2</b>                                                                      | <b>3</b>                                                                                            | <b>4</b>                                                                                      |
|------------------------------------------------------|-------------------------------------------------------------------------------|-------------------------------------------------------------------------------|-----------------------------------------------------------------------------------------------------|-----------------------------------------------------------------------------------------------|
| Formula                                              | C <sub>17</sub> H <sub>26</sub> N <sub>6</sub> O <sub>11</sub> V <sub>2</sub> | C <sub>42</sub> H <sub>52</sub> N <sub>8</sub> O <sub>20</sub> V <sub>4</sub> | C <sub>34</sub> H <sub>70.73</sub> N <sub>8</sub> Na <sub>2</sub> O <sub>38.37</sub> V <sub>4</sub> | C <sub>17</sub> H <sub>18</sub> CS <sub>2</sub> N <sub>4</sub> O <sub>11</sub> V <sub>2</sub> |
| <i>M<sub>r</sub></i> /g mol <sup>-1</sup>            | 592.32                                                                        | 1192.68                                                                       | 1455.33                                                                                             | 821.29                                                                                        |
| <i>T</i> /K                                          | 293                                                                           | 100                                                                           | 200                                                                                                 | 200                                                                                           |
| Cryst. system                                        | Triclinic                                                                     | Monoclinic                                                                    | Monoclinic                                                                                          | Monoclinic                                                                                    |
| Space group                                          | <i>P</i> -1                                                                   | <i>P</i> 2 <sub>1</sub> / <i>c</i>                                            | <i>P</i> 2 <sub>1</sub> / <i>c</i>                                                                  | <i>C</i> 2/ <i>c</i>                                                                          |
| <i>a</i> /Å                                          | 9.4298(5)                                                                     | 12.6070(3)                                                                    | 22.3715(2)                                                                                          | 16.2470(2)                                                                                    |
| <i>b</i> /Å                                          | 10.8957(6)                                                                    | 18.2159(4)                                                                    | 21.0369(2)                                                                                          | 16.4323(2)                                                                                    |
| <i>c</i> /Å                                          | 11.9941(8)                                                                    | 10.6813(3)                                                                    | 13.4229(12)                                                                                         | 19.9683(2)                                                                                    |
| <i>α</i> /°                                          | 85.710(5)                                                                     | 90                                                                            | 90                                                                                                  | 90                                                                                            |
| <i>β</i> /°                                          | 75.669(5)                                                                     | 93.299(2)                                                                     | 103.7215(9)                                                                                         | 111.6234(12)                                                                                  |
| <i>γ</i> /°                                          | 86.699(4)                                                                     | 90                                                                            | 90                                                                                                  | 90                                                                                            |
| <i>V</i> /Å <sup>3</sup>                             | 1189.66(12)                                                                   | 2448.87(11)                                                                   | 6136.92(10)                                                                                         | 4955.9(9)                                                                                     |
| <i>Z</i>                                             | 2                                                                             | 2                                                                             | 4                                                                                                   | 8                                                                                             |
| <i>D</i> <sub>calcd</sub> / mg/m <sup>3</sup>        | 1.653                                                                         | 1.617                                                                         | 1.575                                                                                               | 2.201                                                                                         |
| <i>μ</i> / mm <sup>-1</sup>                          | 0.855                                                                         | 0.827                                                                         | 6.025                                                                                               | 29.472                                                                                        |
| <i>F</i> (000)                                       | 608                                                                           | 1224                                                                          | 3007                                                                                                |                                                                                               |
| Crystal size / mm <sup>3</sup>                       | 0.20 x 0.05 x 0.05                                                            | 0.20 x 0.05 x 0.03                                                            | 0.10 x 0.05 x 0.05                                                                                  | 0.18 x 0.15 x 0.05                                                                            |
| Theta range for data collection / °                  | 2.231 - 30.925                                                                | 1.62 - 26.72                                                                  | 5.846 - 153.74                                                                                      | 7.95 - 133.164                                                                                |
| Index ranges                                         | -13 ≤ <i>h</i> ≤ 11,<br>-14 ≤ <i>k</i> ≤ 14,<br>-15 ≤ <i>l</i> ≤ 16           | -15 ≤ <i>h</i> ≤ 14,<br>-22 ≤ <i>k</i> ≤ 22,<br>-13 ≤ <i>l</i> ≤ 12           | -28 ≤ <i>h</i> ≤ 27,<br>-25 ≤ <i>k</i> ≤ 25,<br>-16 ≤ <i>l</i> ≤ 12                                 | -19 ≤ <i>h</i> ≤ 17,<br>-19 ≤ <i>k</i> ≤ 18,<br>-23 ≤ <i>l</i> ≤ 23                           |
| Refls collected/independent                          | 17723/5998<br>( <i>R</i> <sub>int</sub> =0.0382)                              | 14830/4666<br>( <i>R</i> <sub>int</sub> =0.0301)                              | 49553/12155<br>( <i>R</i> <sub>int</sub> =0.0325)                                                   | 15673/4377<br>( <i>R</i> <sub>int</sub> =0.0394)                                              |
| Data/restrains/parameters                            | 5998 /24/ 367                                                                 | 4666 / 0 / 342                                                                | 12155 / 4 / 683                                                                                     | 4377/1/332                                                                                    |
| Goodness-of-fit on <i>F</i> <sup>2</sup>             | 1.095                                                                         | 1.05                                                                          | 1.084                                                                                               | 1.030                                                                                         |
| Final <i>R</i> <sub>1</sub> , <i>wR</i> <sub>2</sub> | <i>R</i> <sub>1</sub> =0.0377,<br><i>wR</i> <sub>2</sub> = 0.0980             | <i>R</i> <sub>1</sub> = 0.0364,<br><i>wR</i> <sub>2</sub> = 0.087             | <i>R</i> <sub>1</sub> = 0.0760,<br><i>wR</i> <sub>2</sub> = 0.2303                                  | <i>R</i> <sub>1</sub> = 0.0332,<br><i>wR</i> <sub>2</sub> = 0.0906                            |

|                                                            |                                     |                                     |                                     |                                     |
|------------------------------------------------------------|-------------------------------------|-------------------------------------|-------------------------------------|-------------------------------------|
| <i>R</i> indices $R_1$ , $wR_2$ (all data)                 | $R_1 = 0.0532$ ,<br>$wR_2 = 0.1042$ | $R_1 = 0.0484$ ,<br>$wR_2 = 0.0878$ | $R_1 = 0.0850$ ,<br>$wR_2 = 0.2399$ | $R_1 = 0.0339$ ,<br>$wR_2 = 0.0913$ |
| Largest diff. peak and hole /<br>$e \cdot \text{\AA}^{-3}$ | 0.363 / -0.32                       | 0.483 / -0.312                      | 1.93 / -0.74                        | 1.20, -1.35                         |
| CCDC                                                       | 2495523                             | 2495524                             | 2495525                             | 2495527                             |

---

Crystallographic measurements for **3** and **4** were carried out with a Rigaku XtaLAB Synergy Dualflex diffractometer with a HyPix detector using Cu K $\alpha$  radiation at 200 K

**Table S2.** Selected bond distances (Å) in 1–4

| 1       |            |                      |            |                       |            |                                                   |            |
|---------|------------|----------------------|------------|-----------------------|------------|---------------------------------------------------|------------|
| V1–O1   | 1.9106(14) | V1–N1                | 2.1456(17) | V2–O5                 | 1.9400(14) | V2–O7                                             | 1.6344(16) |
| V1–O2   | 1.6205(16) | V1–N3                | 2.0462(16) | V2–O6                 | 1.6314(16) | V2–N4                                             | 2.1989(16) |
| V1–O3   | 1.6407(14) | V2–O4                | 1.8811(14) |                       |            |                                                   |            |
| 2       |            |                      |            |                       |            |                                                   |            |
| V1–O1   | 1.8844(18) | V1–N1                | 2.168(2)   | V2–O4                 | 1.8281(17) | V2–O9                                             | 1.7619(17) |
| V1–O6   | 1.6305(17) | V1–N3                | 2.0858(19) | V2–O8                 | 1.5903(18) | V2–N4                                             | 2.1694(19) |
| V1–O7   | 1.6211(17) | V2–O3                | 1.9833(16) |                       |            |                                                   |            |
| 3       |            |                      |            |                       |            |                                                   |            |
| V1A–O2A | 1.918(3)   | V2A–O5A              | 1.963(3)   | Na1A–O1A              | 2.441(3)   | Na1B–O1WY                                         | 2.349(9)   |
| V1A–O3A | 1.646(3)   | V2A–O6A              | 1.880(4)   | Na1A–O1WA             | 2.309(7)   | Na1B–O2B                                          | 2.353(4)   |
| V1A–O4A | 1.617(3)   | V2A–O8A              | 1.625(4)   | Na1A–O1WX             | 2.355(11)  | Na1B–O2WB                                         | 2.409(6)   |
| V1A–N1A | 2.165(4)   | V2A–O9A              | 1.650(4)   | Na1A–O2A              | 2.355(3)   | Na1B–O3B                                          | 2.923(4)   |
| V1A–N3A | 2.059(3)   | V2A–N4A              | 2.173(4)   | Na1A–O2WA             | 2.356(7)   | Na1B–O6B <sup>2</sup>                             | 2.547(4)   |
| V1B–O2B | 1.911(3)   | V2B–O5B              | 1.945(4)   | Na1A–O2WX             | 2.381(8)   | Na1B–O9B <sup>2</sup>                             | 2.441(5)   |
| V1B–O3B | 1.645(4)   | V2B–O6B              | 1.881(4)   | Na1A–O3A              | 2.874(3)   | Na1B–O1WB                                         | 2.375(6)   |
| V1B–O4B | 1.623(4)   | V2B–O8B              | 1.639(5)   | Na1A–O6A <sup>1</sup> | 2.739(5)   | <sup>1</sup> -x,1-y,2-z; <sup>2</sup> 1-x,1-y,3-z |            |
| V1B–N1B | 2.171(4)   | V2B–O9B              | 1.638(4)   | Na1A–O9A <sup>1</sup> | 2.425(4)   |                                                   |            |
| V1B–N3B | 2.038(3)   | V2B–N4B              | 2.170(4)   | Na1B–O1B              | 2.438(4)   |                                                   |            |
| 4       |            |                      |            |                       |            |                                                   |            |
| V1–O2   | 1.894(3)   | Cs1X–O2W             | 3.188(8)   | Cs1–O2W               | 2.993(2)   | Cs2–O3 <sup>5</sup>                               | 3.083(3)   |
| V1–O3   | 1.654(3)   | Cs1X–O2              | 3.162(5)   | Cs1–O2                | 3.165(2)   | Cs2–O4 <sup>5</sup>                               | 3.121(3)   |
| V1–O4   | 1.622(3)   | Cs1X–O3WX            | 3.806(17)  | Cs1–O3W               | 3.375(9)   | Cs2–O4 <sup>4</sup>                               | 3.140(3)   |
| V1–O5   | 1.964(3)   | Cs1X–O3              | 3.143(6)   | Cs1–O3WX              | 3.352(11)  | Cs2–O7 <sup>4</sup>                               | 3.303(3)   |
| V1–N1   | 2.165(3)   | Cs1X–O6 <sup>2</sup> | 3.185(7)   | Cs1–O3WX <sup>1</sup> | 3.73(2)    | Cs2–O7                                            | 3.132(3)   |

|       |          |                      |           |                     |          |                                                                                                                                                               |          |
|-------|----------|----------------------|-----------|---------------------|----------|---------------------------------------------------------------------------------------------------------------------------------------------------------------|----------|
| V2-O6 | 1.636(3) | Cs1X-O8 <sup>2</sup> | 3.192(8)  | Cs1-O3              | 3.075(3) | Cs2-O8                                                                                                                                                        | 3.120(3) |
| V2-O7 | 1.636(3) | Cs1X-O9 <sup>2</sup> | 2.880(13) | Cs1-O6 <sup>2</sup> | 3.043(3) | Cs2-O9                                                                                                                                                        | 3.311(3) |
| V2-O8 | 1.903(3) | Cs1X-N3 <sup>3</sup> | 3.426(6)  | Cs1-O8 <sup>2</sup> | 3.428(4) | <sup>1</sup> 2-x,+y,3/2-z; <sup>2</sup> 1/2+x,1/2-y,1/2+z;<br><sup>3</sup> 3/2-x,-1/2+y,3/2-z; <sup>4</sup> 1/2-x,1/2-y,1-z; <sup>5</sup> -1/2+x,1/2-y,-1/2+z |          |
| V2-N2 | 2.027(3) | Cs1-O1               | 3.038(3)  | Cs1-O9 <sup>2</sup> | 3.304(4) |                                                                                                                                                               |          |
| V2-N4 | 2.152(3) | Cs1-O1W              | 3.556(4)  | Cs1-N3 <sup>3</sup> | 3.505(3) |                                                                                                                                                               |          |

**Table S3.** Details of the hydrogen bonding interactions in **1-4**

| Contact D–H···A           | Distance, Å |           |           | Angle<br>DHA, ° | Symmetry<br>transformations |
|---------------------------|-------------|-----------|-----------|-----------------|-----------------------------|
|                           | D–H         | H···A     | D···A     |                 |                             |
| <b>1</b>                  |             |           |           |                 |                             |
| O10–H10A···O2             | 0.837(17)   | 2.32(2)   | 3.074(3)  | 149(3)          | 1–x, 1–y, 1–z               |
| O10–H10B···O7             | 0.839(18)   | 2.22(2)   | 3.033(3)  | 163(3)          | 1–x, –y, 1–z                |
| O11–H11A···N2             | 0.836(17)   | 1.945(18) | 2.777(2)  | 174(3)          | x, y, z                     |
| O11–H11B···O2             | 0.824(17)   | 2.134(19) | 2.944(2)  | 167(3)          | 1–x, 1–y, –z                |
| N5–H5A···O10              | 0.855(10)   | 1.989(12) | 2.823(3)  | 166(3)          | x, y, z                     |
| N5–H5B···O7               | 0.853(10)   | 2.238(11) | 3.090(3)  | 176(3)          | x, y, z                     |
| N5–H5C···O1               | 0.855(11)   | 2.28(2)   | 2.920(3)  | 132(2)          | 1–x, 1–y, 1–z               |
| N5–H5C···O8               | 0.855(11)   | 2.136(17) | 2.910(3)  | 150(3)          | 1–x, 1–y, 1–z               |
| N5–H5D···O3               | 0.856(12)   | 2.048(12) | 2.899(3)  | 172(3)          | x, y, z                     |
| N6–H6A···O4               | 0.848(10)   | 2.166(16) | 2.968(3)  | 158(3)          | –1+x, y, z                  |
| N6–H6A···O9               | 0.848(10)   | 2.30(3)   | 2.919(3)  | 130(3)          | –1+x, y, z                  |
| N6–H6B···O11              | 0.853(11)   | 1.992(11) | 2.843(3)  | 175(3)          | x, y, z                     |
| N6–H6C···O6               | 0.852(12)   | 2.093(19) | 2.889(3)  | 155(4)          | 1–x, –y, –z                 |
| N6–H6B···O11              | 0.850(12)   | 2.40(3)   | 3.075(3)  | 137(3)          | 1–x, –y, –z                 |
| <b>2</b>                  |             |           |           |                 |                             |
| N2–H2···O20               | 0.933       | 1.838     | 2.769(3)  | 175(2)          | x, y, z                     |
| O20–H20···O7              | 0.84        | 2.08      | 2.912(2)  | 171(2)          | –x, 1/2+y, 3/2–z            |
| <b>3</b>                  |             |           |           |                 |                             |
| O2W–H2WH···O5A            | 0.87        | 2.76      | 3.374(8)  | 129.4           | –x, 1–y, 2–z                |
| O1WA–H1WA···O1W           | 0.87        | 1.64      | 2.461(8)  | 155.9           | x, y, z                     |
| O2WB–H2WE···O2WX          | 0.88        | 2.23      | 2.835(13) | 125.8           | x, y, 1+z                   |
| O2WX–H2WD···O7A           | 0.86        | 2.51      | 3.178(11) | 136.0           | –x, 1–y, 2–z                |
| <b>4</b>                  |             |           |           |                 |                             |
| O1W–H···O3                | 0.86        | 2.19      | 2.805(4)  | 127.4           | x, y, z                     |
| O3W–H···O1W               | 0.83        | 2.38      | 2.812(8)  | 113.3           | x, y, z                     |
| O3WX–H···O1W <sup>1</sup> | 0.87        | 2.44      | 2.841(13) | 143.8           | 2–x, +y, 3/2–z              |
| O3WX–H···O1W              | 0.88        | 2.35      | 2.85(2)   | 116.0           | x, y, z                     |

**Table S4.** Continuous shape measures (CShM) of the coordination geometries of V(V) centers in **1-4** using SHAPE v2.0 [1]\*

|          |     | <i>PP-5</i>           | <i>vOC-5</i>                   | <i>TBPY-5</i>                   | <i>SPY-5</i>                          | <i>JTBPY-5</i>                              |
|----------|-----|-----------------------|--------------------------------|---------------------------------|---------------------------------------|---------------------------------------------|
|          | ML5 | Pentagon ( $D_{5h}$ ) | Vacant octahedron ( $C_{4v}$ ) | Trigonal bipyramid ( $D_{3h}$ ) | Spherical square pyramid ( $C_{4v}$ ) | Johnson trigonal bipyramid J12 ( $D_{3h}$ ) |
| <b>1</b> | V1  | 27.903                | 3.227                          | 3.567                           | <b>1.859</b>                          | 5.276                                       |
|          | V2  | 30.880                | 2.360                          | 3.674                           | <b>1.105</b>                          | 5.736                                       |
| <b>2</b> | V1  | 27.460                | 5.099                          | <b>2.949</b>                    | 3.661                                 | 4.630                                       |
|          | V2  | 28.364                | <b>1.041</b>                   | 7.053                           | 1.704                                 | 7.833                                       |
| <b>3</b> | V1A | 27.838                | 2.854                          | 3.973                           | <b>1.740</b>                          | 5.636                                       |
|          | V2A | 30.043                | 1.553                          | 5.523                           | <b>0.924</b>                          | 7.510                                       |
|          | V1B | 28.007                | 2.507                          | 4.388                           | <b>1.386</b>                          | 6.181                                       |
|          | V2B | 30.412                | 1.532                          | 5.634                           | <b>0.809</b>                          | 7.697                                       |
| <b>4</b> | V1  | 30.301                | 1.607                          | 5.340                           | <b>0.830</b>                          | 7.367                                       |
|          | V2  | 28.342                | 5.684                          | <b>2.447</b>                    | 4.123                                 | 4.241                                       |

\*A value of zero corresponds to an exact match of the corresponding center to the ideal geometry.

[1] (a) M. Llunell, D. Casanova, J. Cirera, P. Alemany, S. Alvarez, *SHAPE 2.0*, Universitat de Barcelona, Barcelona, **2010**; (b) S. Alvarez, P. Alemany, D. Casanova, J. Cirera, M. Llunell, D. Avnir, *Coord. Chem. Rev.* **2005**, *249*, 1693–1708.

**Table S5.** Continuous shape measures (CShM) of the coordination geometries of alkali metal centers in **3-4** using SHAPE v2.0 [1]\*

|          |       | <i>HP-7</i>           | <i>HPY-7</i>                   | <i>PBPY-7</i>                   | <i>COC-7</i>                   | <i>CTPR-7</i>                      | <i>JPBPY-7</i>                                | <i>JETRY-7</i>                                       |
|----------|-------|-----------------------|--------------------------------|---------------------------------|--------------------------------|------------------------------------|-----------------------------------------------|------------------------------------------------------|
|          | [ML7] | Heptagon ( $D_{7h}$ ) | Hexagonal pyramid ( $C_{6v}$ ) | Pentagonal pyramid ( $D_{5h}$ ) | Capped octahedron ( $C_{3v}$ ) | Capped trigonal prism ( $C_{2v}$ ) | Johnson pentagonal bipyramid J13 ( $D_{5h}$ ) | Johnson elongated triangular pyramid J7 ( $C_{3v}$ ) |
| <b>3</b> | Na1A  | 28.124                | 20.117                         | 8.201                           | 4.016                          | <b>3.286</b>                       | 11.944                                        | 14.307                                               |
|          | Na1B  | 28.982                | 19.205                         | 7.639                           | <b>3.015</b>                   | 3.159                              | 10.585                                        | 15.698                                               |
| <b>4</b> | Cs2   | 27.082                | 13.706                         | 24.121                          | 19.459                         | 18.288                             | 24.467                                        | <b>11.288</b>                                        |

|          |       | <i>OP-8</i>          | <i>HPY-8</i>                    | <i>HBPY-8</i>                    | <i>CU-8</i>    | <i>SAPR-8</i>                 | <i>TDD-8</i>                         | <i>JGBF-8</i>                            | <i>JETBPY-8</i>                                         | <i>JBTPR-8</i>                              | <i>BTPR-8</i>                           | <i>JSD-8</i>                     | <i>TT-8</i>                   | <i>ETBPY-8</i>                            |
|----------|-------|----------------------|---------------------------------|----------------------------------|----------------|-------------------------------|--------------------------------------|------------------------------------------|---------------------------------------------------------|---------------------------------------------|-----------------------------------------|----------------------------------|-------------------------------|-------------------------------------------|
|          | [ML8] | Octagon ( $D_{8h}$ ) | Heptagonal pyramid ( $C_{7v}$ ) | Hexagonal bipyramid ( $D_{6h}$ ) | Cube ( $O_h$ ) | Square antiprism ( $D_{4d}$ ) | Triangular dodecahedron ( $D_{2d}$ ) | Johnson gyrobifastigium J26 ( $D_{2d}$ ) | Johnson elongated triangular bipyramid J14 ( $D_{3h}$ ) | Biaugmented trigonal prism J50 ( $C_{2v}$ ) | Biaugmented trigonal prism ( $C_{2v}$ ) | Snub diphenoind J84 ( $D_{2d}$ ) | Triakis tetrahedron ( $T_d$ ) | Elongated trigonal bipyramid ( $D_{3h}$ ) |
| <b>4</b> | Cs1   | 23.763               | 19.297                          | 16.351                           | 17.870         | 17.808                        | 17.667                               | 14.716                                   | 20.023                                                  | 14.878                                      | 14.183                                  | 17.038                           | 17.355                        | <b>13.430</b>                             |

|  |  | <i>DP-10</i> | <i>EPY-10</i> | <i>OBPY-10</i> | <i>PPR-10</i> | <i>PAPR-10</i> | <i>JBCCU-10</i> | <i>JBCSAR-P-10</i> | <i>JMBIC-10</i> | <i>JATDI-10</i> | <i>JSPC-10</i> | <i>SDD-10</i> | <i>TD-10</i> | <i>HD-10</i> |
|--|--|--------------|---------------|----------------|---------------|----------------|-----------------|--------------------|-----------------|-----------------|----------------|---------------|--------------|--------------|
|--|--|--------------|---------------|----------------|---------------|----------------|-----------------|--------------------|-----------------|-----------------|----------------|---------------|--------------|--------------|

|          | [ML10] | Decagon<br>( $D_{10h}$ ) | Enneagonal<br>pyramid<br>( $C_{9v}$ ) | Octagonal<br>bipyramid<br>( $D_{8h}$ ) | Pentagonal<br>prism ( $D_{5h}$ ) | Pentagonal<br>antiprism<br>( $D_{5d}$ ) | Bicapped<br>cube J15<br>( $D_{4h}$ ) | Bicapped<br>square<br>antiprism<br>J17 ( $D_{4d}$ ) | Metabidi<br>minished<br>icosahedron<br>J62<br>( $C_{2v}$ ) | Augmented<br>tridiminished<br>icosahedron<br>J64<br>( $C_{3v}$ ) | Sphenocorona<br>J87<br>( $C_{2v}$ ) | Staggered<br>Dodecahedron<br>(2:6:2)<br>( $D_2$ ) | Tetradecahedron<br>(2:6:2)<br>( $C_{2v}$ ) | Hexadecahedron<br>(2:6:2)<br>or<br>(1:4:4:1)<br>( $D_{4h}$ ) |
|----------|--------|--------------------------|---------------------------------------|----------------------------------------|----------------------------------|-----------------------------------------|--------------------------------------|-----------------------------------------------------|------------------------------------------------------------|------------------------------------------------------------------|-------------------------------------|---------------------------------------------------|--------------------------------------------|--------------------------------------------------------------|
| <b>4</b> | Cs1    | 36.422                   | 25.713                                | 16.442                                 | <b>9.163</b>                     | 15.001                                  | 15.066                               | 14.063                                              | 9.572                                                      | 10.519                                                           | 10.815                              | 10.780                                            | 9.830                                      | 12.211                                                       |

\*A value of zero corresponds to an exact match of the corresponding center to the ideal geometry.

[1] (a) M. Llunell, D. Casanova, J. Cirera, P. Alemany, S. Alvarez, *SHAPE 2.0*, Universitat de Barcelona, Barcelona, **2010**; (b) S. Alvarez, P. Alemany, D. Casanova, J. Cirera, M. Llunell, D. Avnir, *Coord. Chem. Rev.* **2005**, *249*, 1693–1708.
